# Supplementary material for: 1,2,3-Triazole-containing flex-nucleoside analogs and sulfonamido-ribofuranoside conjugates: design, synthesis, and antiproliferative potential
Source: Royal Society of Chemistry journal article supplement (doi:10.1039/d3nj03724j), 2023-01-01
Supplement: d3nj03724j1.pdf [file d3nj03724j1.pdf]

## Supporting Information

### 1,2,3-Triazole-Containing Flex-Nucleoside Analogs and Sulfonamido-Ribofuranoside Conjugates: Design, Synthesis, and Antiproliferative Potential

Dijana Pavlović Saftić\*,<sup>[a]</sup> Željka Ban,<sup>[a]</sup> Katarina Mišković Špoljarić,<sup>[b]</sup> Ljubica Glavaš-Obrovac\*,<sup>[b]</sup> and Biserka Žinić\*,<sup>[a]</sup>

<sup>a</sup>Laboratory for Biomolecular Interactions and Spectroscopy, Division of Organic Chemistry and Biochemistry, Ruđer Bošković Institute, Bijenička cesta 54, 10000 Zagreb, Croatia.

<sup>b</sup>Department of Chemistry, Biochemistry and Clinical Chemistry, Faculty of Medicine, Josip Juraj Strossmayer University of Osijek, Huttlerova 4, 31000 Osijek, Croatia.

Email: Dijana.Pavlovic.Saftic@irb.hr; lgobrovac@mefos.hr; bzinic@irb.hr

| Content                                                                                                                                                                                                                                                          | Page    |
|------------------------------------------------------------------------------------------------------------------------------------------------------------------------------------------------------------------------------------------------------------------|---------|
| <b><sup>1</sup>H NMR and <sup>13</sup>C NMR spectra for Flex-Nucleoside Analogs</b>                                                                                                                                                                              |         |
| C5-[1,2,3]triazolyl-uridines <b>7–12</b>                                                                                                                                                                                                                         | S2–S7   |
| C5-[1,2,3]triazolyl-uracils <b>13, 14</b>                                                                                                                                                                                                                        | S8–S9   |
| uracil-[1,2,3]triazole-ribofuranosides <b>16–18</b>                                                                                                                                                                                                              | S10–S12 |
| uridine-[1,2,3]triazole-ribofuranosides <b>19, 20</b>                                                                                                                                                                                                            | S13–S14 |
| <b><sup>1</sup>H NMR and <sup>13</sup>C NMR spectra for Ribofuranoside Conjugates</b>                                                                                                                                                                            |         |
| 1,2,3-triazolyl-ribofuranoside conjugates <b>23–25</b>                                                                                                                                                                                                           | S15–S17 |
| 1,2,3-triazolyl-sulfonamido-ribofuranoside conjugates <b>26–28</b>                                                                                                                                                                                               | S18–S20 |
| 5-azido-ribosyl-sulfonamides <b>31–33</b>                                                                                                                                                                                                                        | S21–S23 |
| <b>Table S1.</b> Sensitivity of human tumor and normal cells to C5-[1,2,3]triazolyl-<br>-flex-nucleoside analogs ( <b>7–14, 16–20</b> ) expressed as <b>IC<sub>50</sub></b> value and<br><b>SI</b> tumor selectivity index                                       | S24     |
| <b>Table S2.</b> Sensitivity of human tumor and normal cells to investigated<br>ribofuranoside conjugates ( <b>23–28</b> ), and 5-azido-ribosyl-sulfonamides ( <b>31–33</b> )<br>expressed as <b>IC<sub>50</sub></b> value and <b>SI</b> tumor selectivity index | S25     |

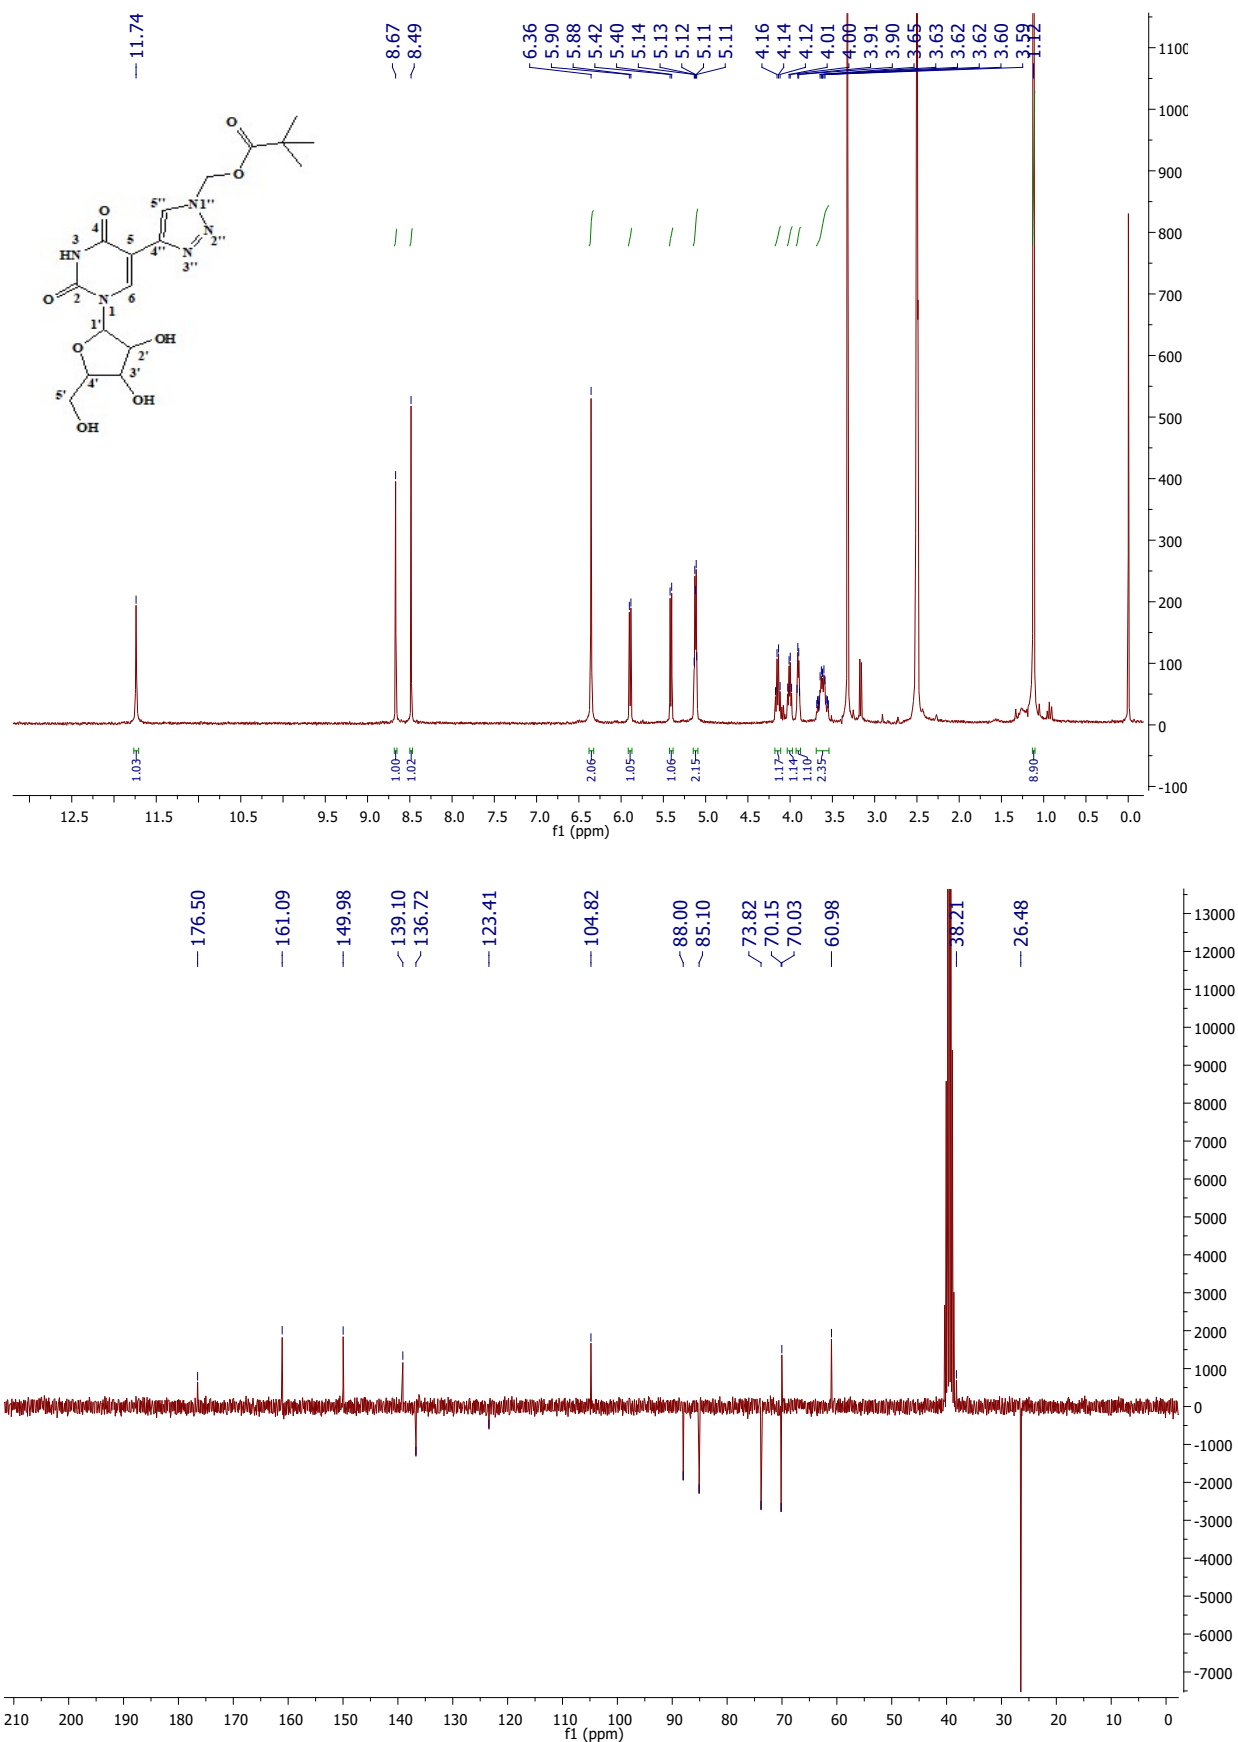

**Figure S1.** <sup>1</sup>H NMR (300 MHz, DMSO-d<sub>6</sub>) and <sup>13</sup>C NMR spectra (75 MHz, APT, DMSO-d<sub>6</sub>) of compound **7**.

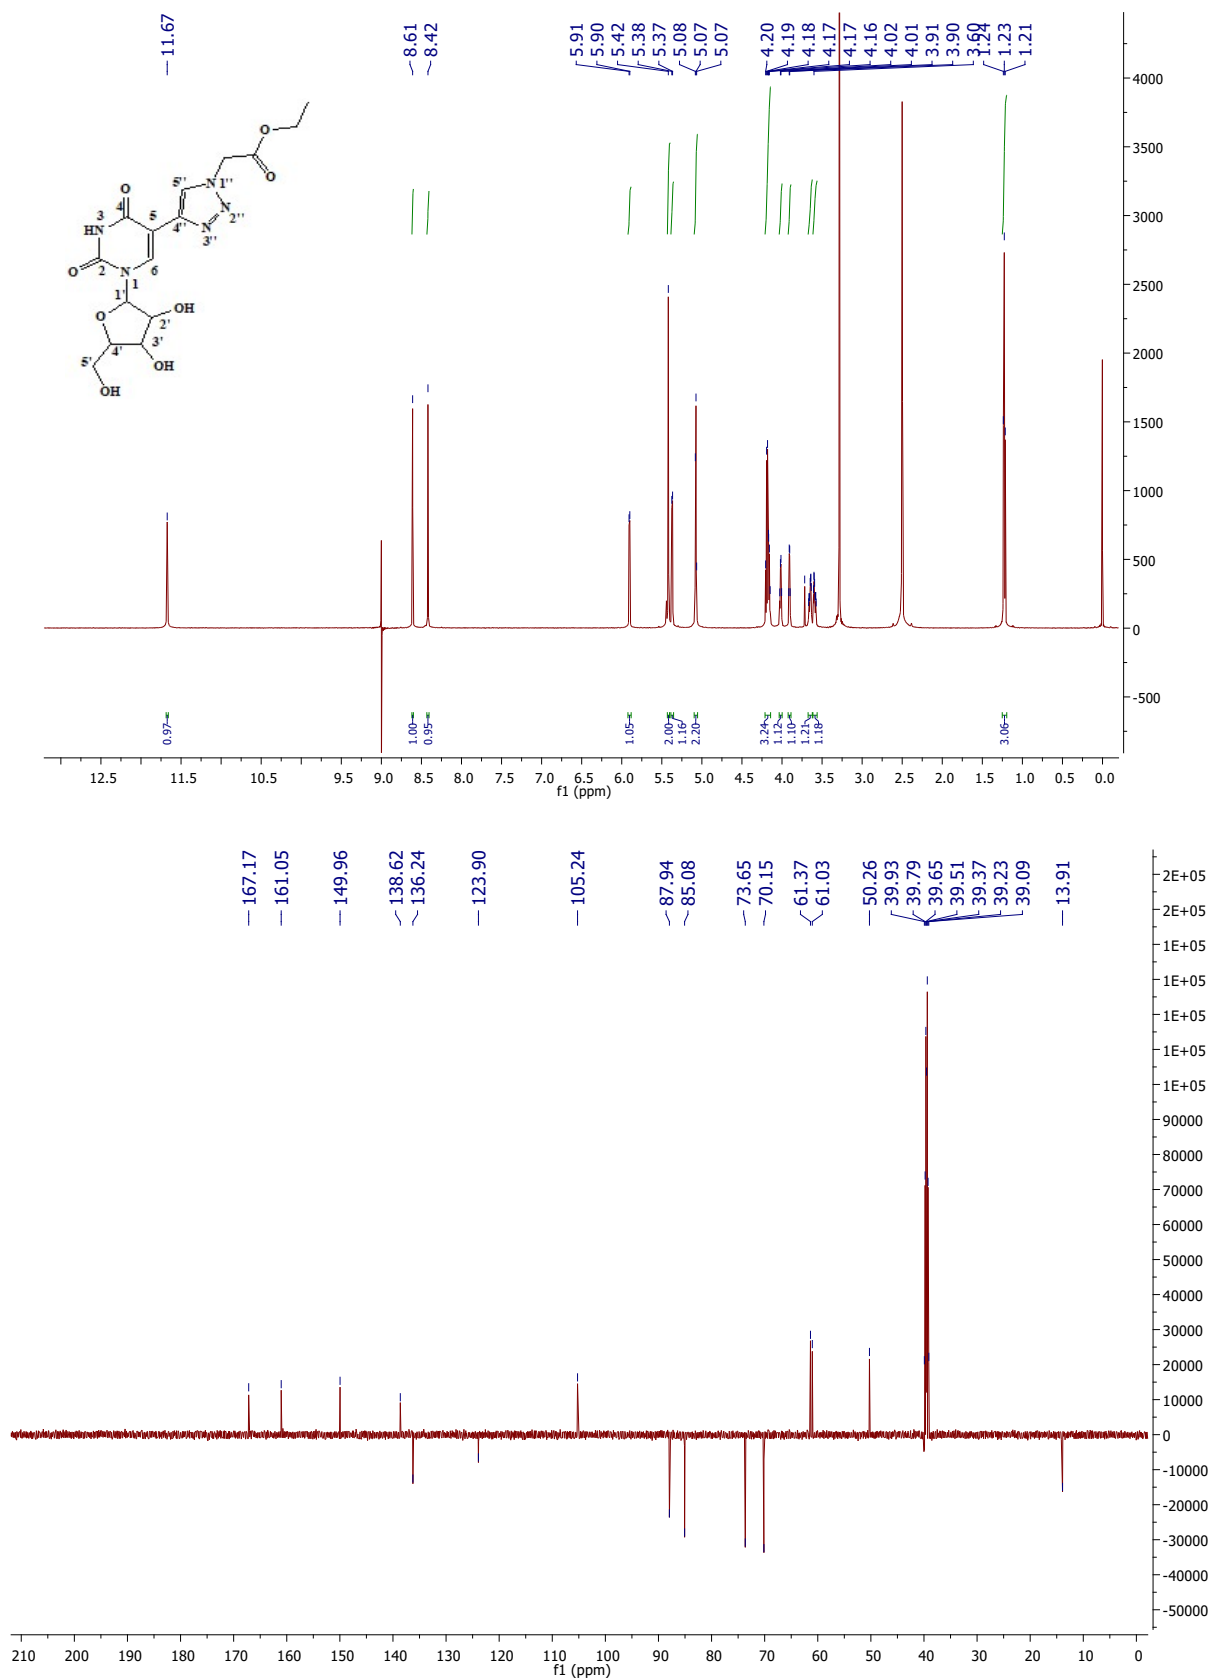

**Figure S2.** <sup>1</sup>H NMR (300 MHz, DMSO-*d*<sub>6</sub>) and <sup>13</sup>C NMR spectra (75 MHz, APT, DMSO-*d*<sub>6</sub>) of compound **8**.

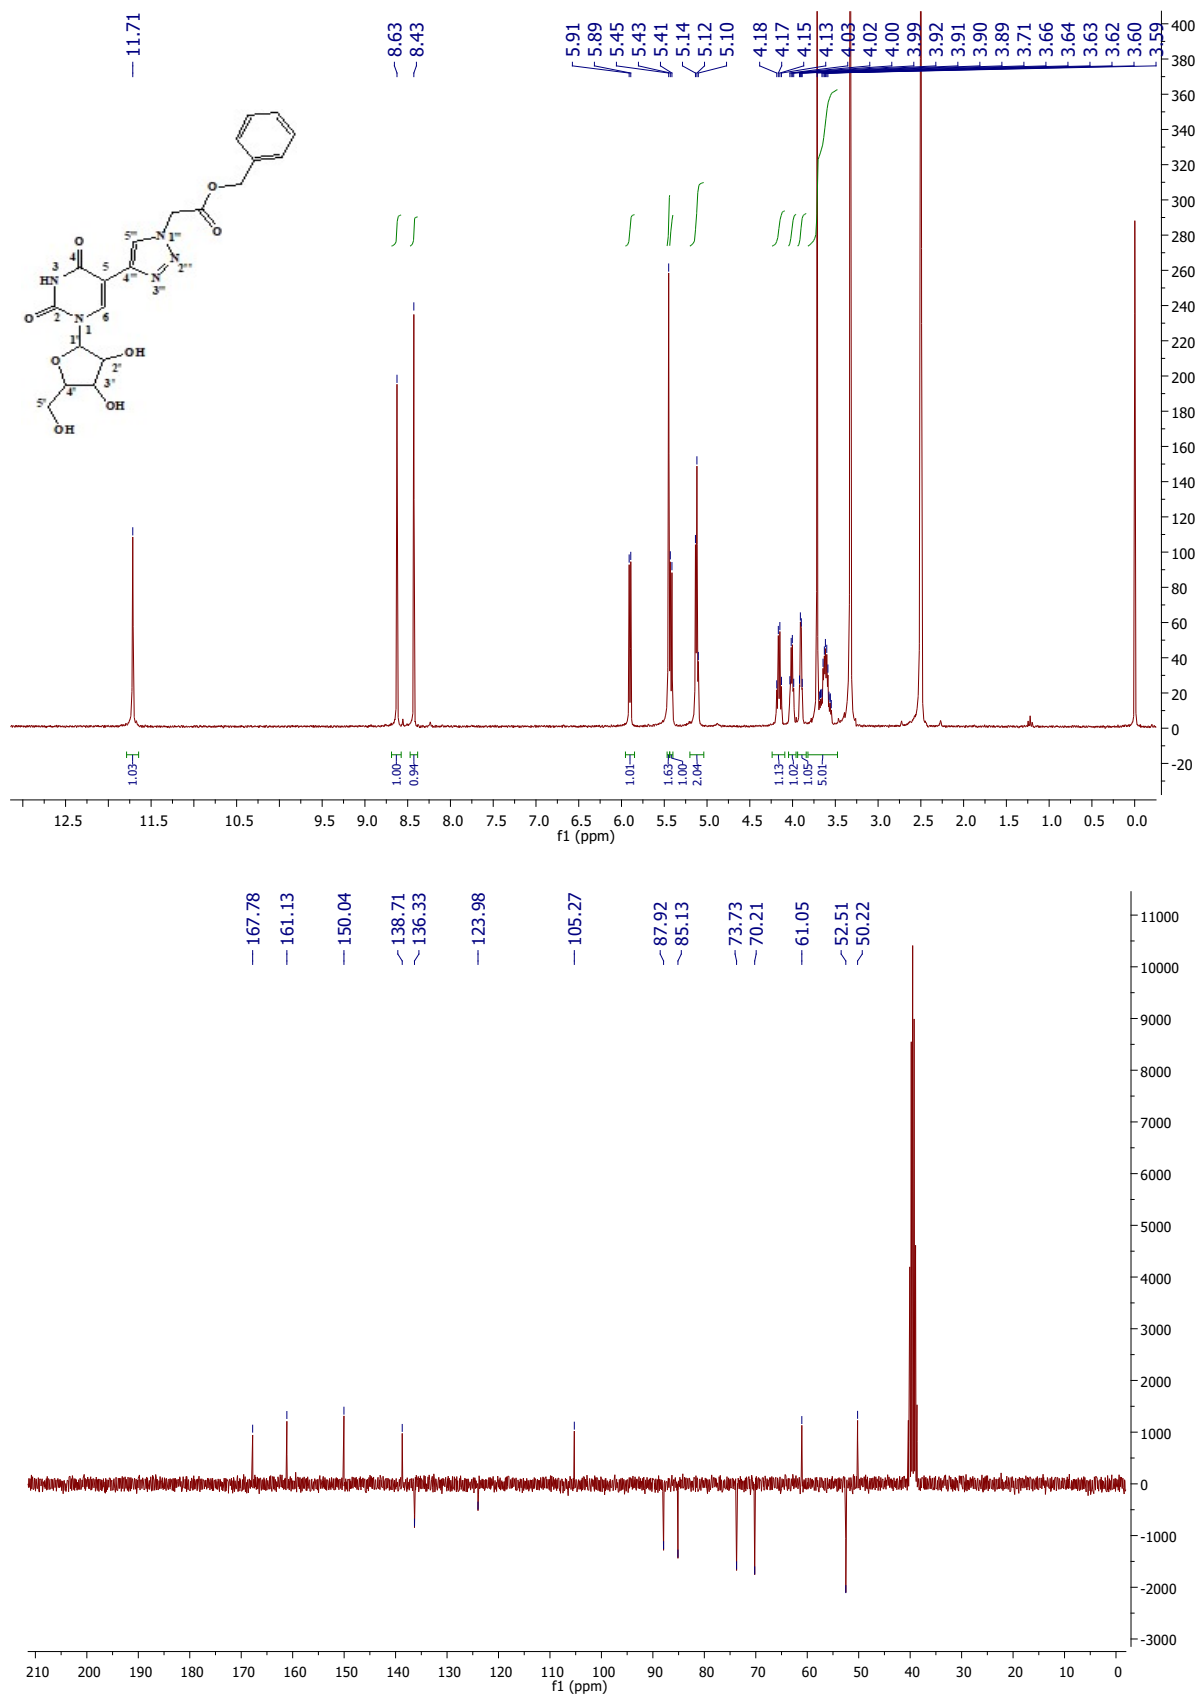

**Figure S3.** <sup>1</sup>H NMR (300 MHz, DMSO-*d*<sub>6</sub>) and <sup>13</sup>C NMR spectra (75 MHz, APT, DMSO-*d*<sub>6</sub>) of compound **9**.

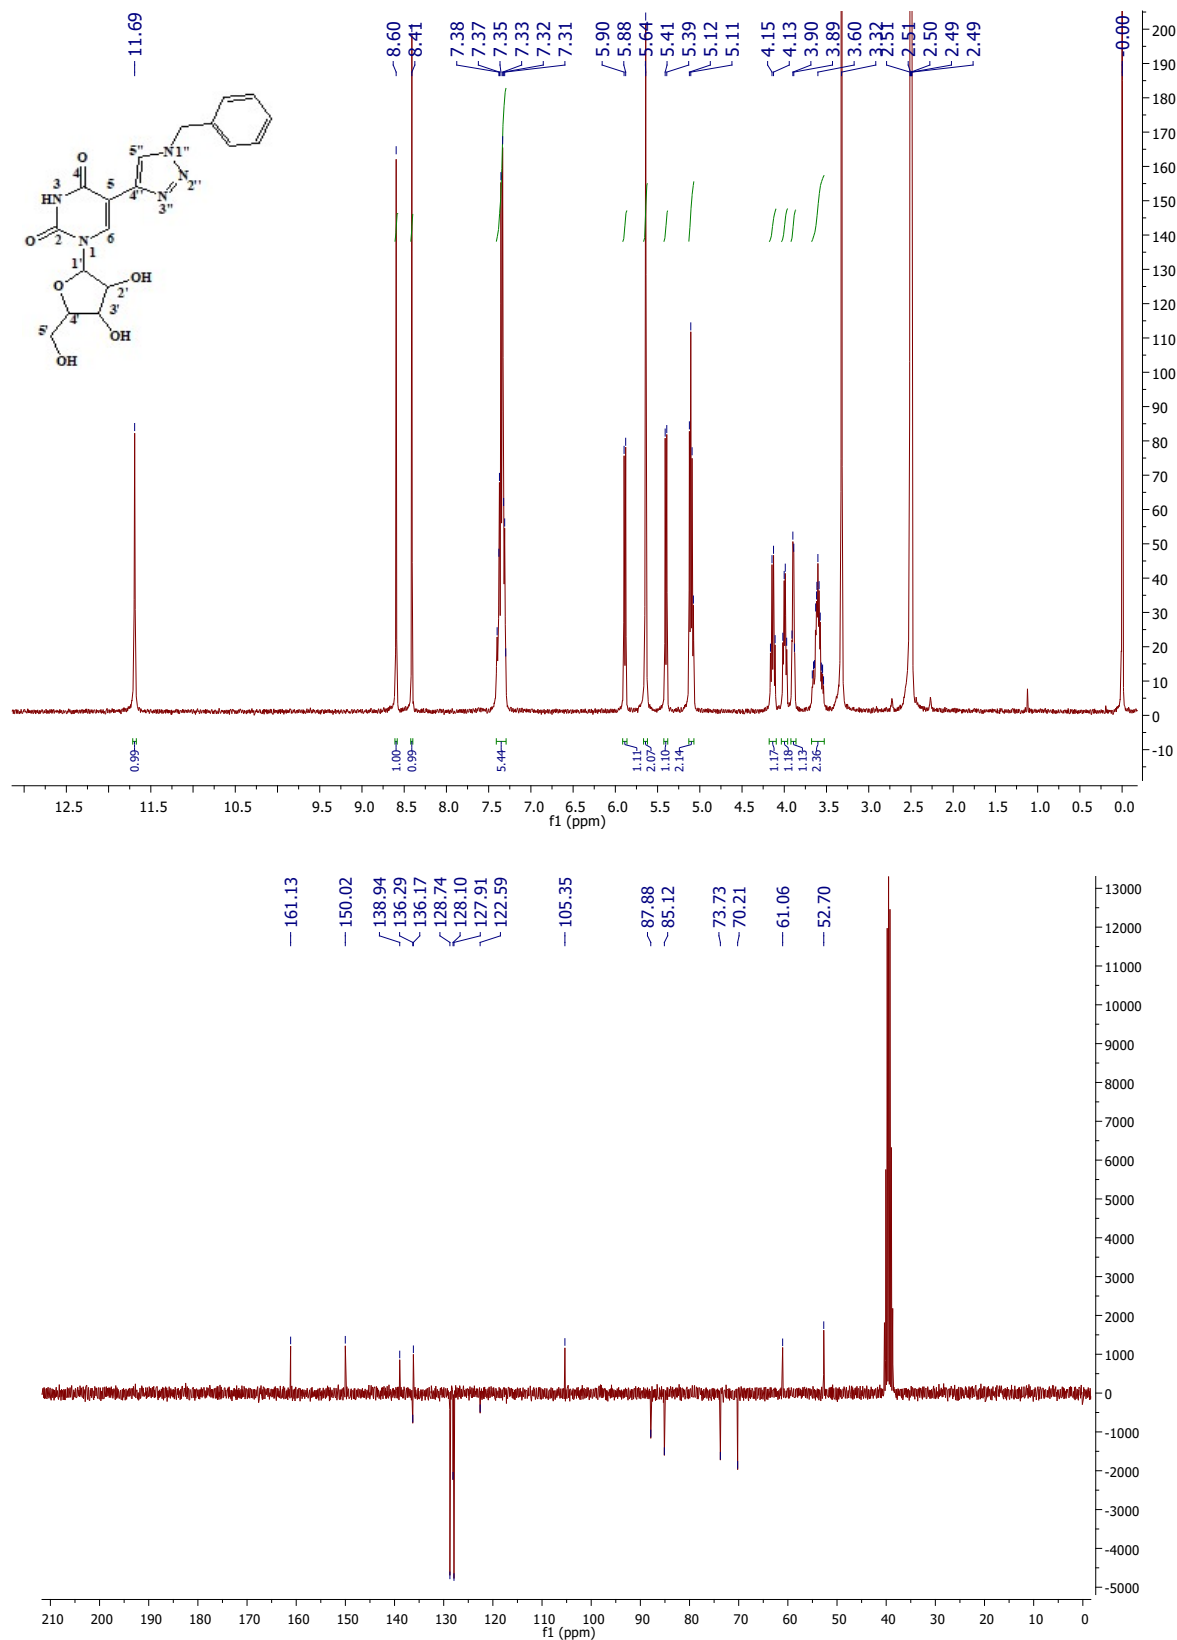

**Figure S4.** <sup>1</sup>H NMR (300 MHz, DMSO-d<sub>6</sub>) and <sup>13</sup>C NMR spectra (75 MHz, APT, DMSO-d<sub>6</sub>) of compound **10**.

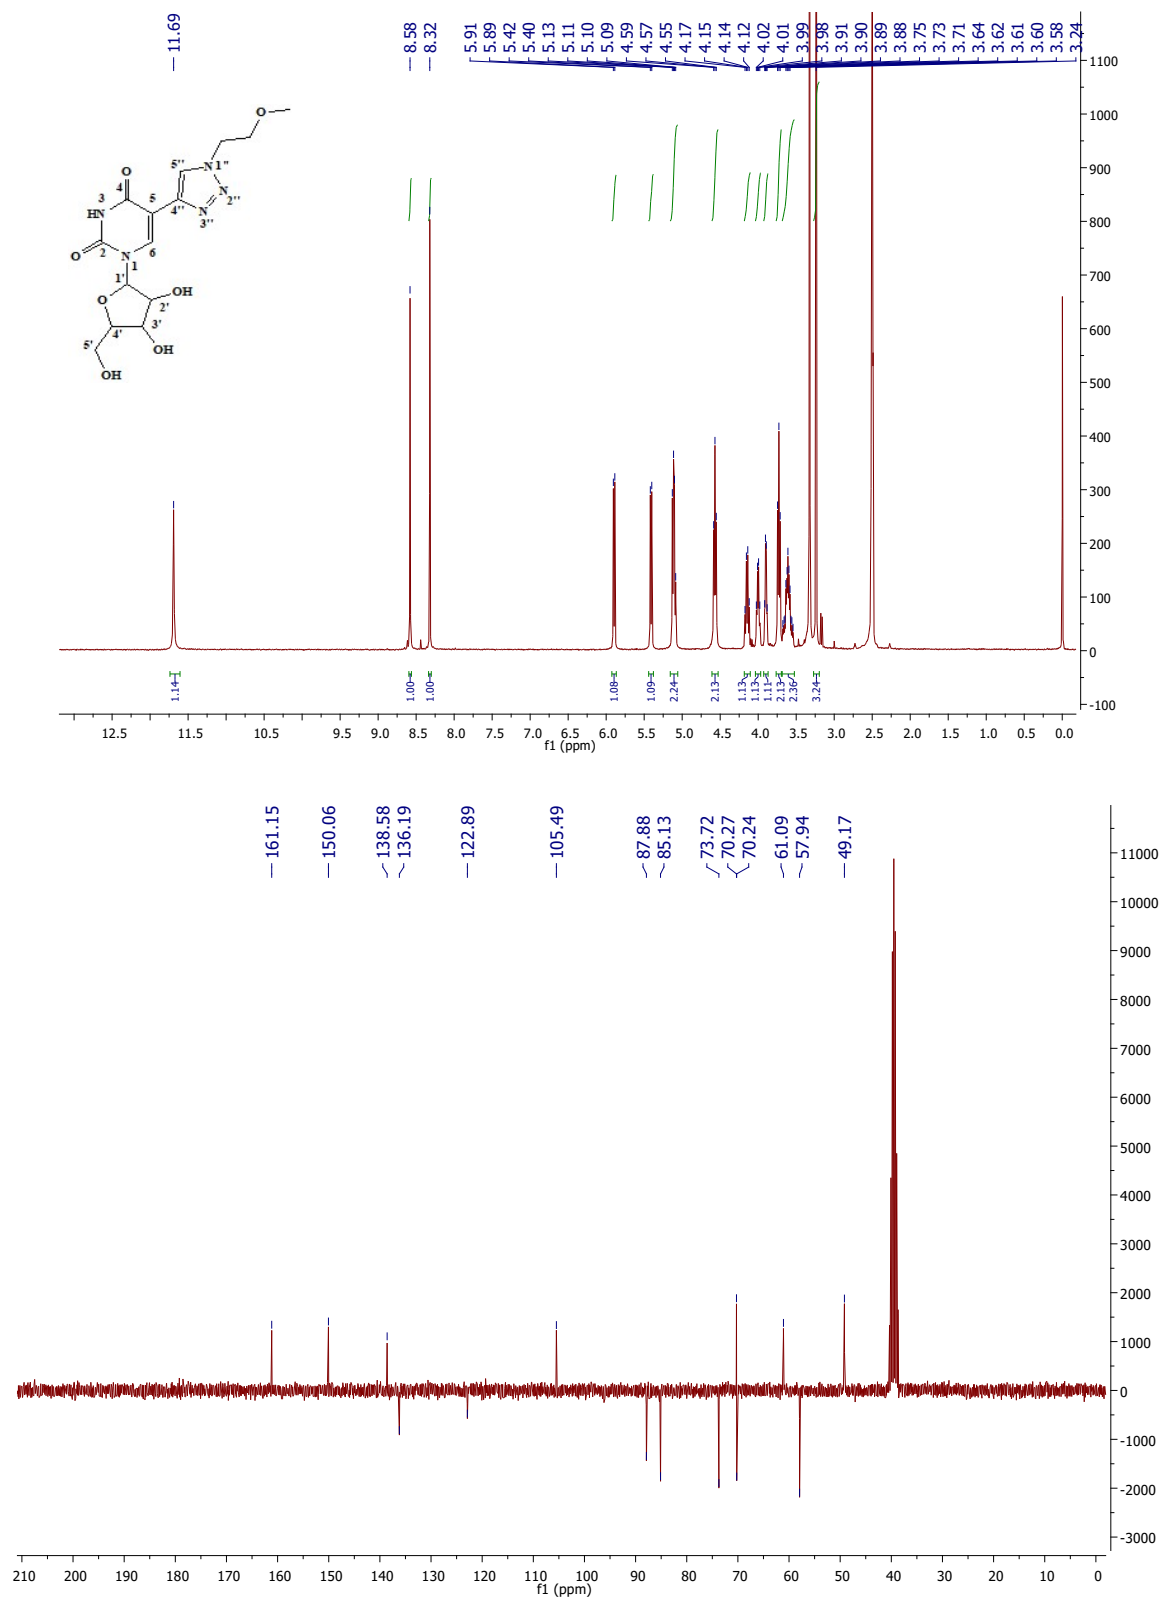

**Figure S5.** <sup>1</sup>H NMR (300 MHz, DMSO-*d*<sub>6</sub>) and <sup>13</sup>C NMR spectra (75 MHz, APT, DMSO-*d*<sub>6</sub>) of compound **11**.

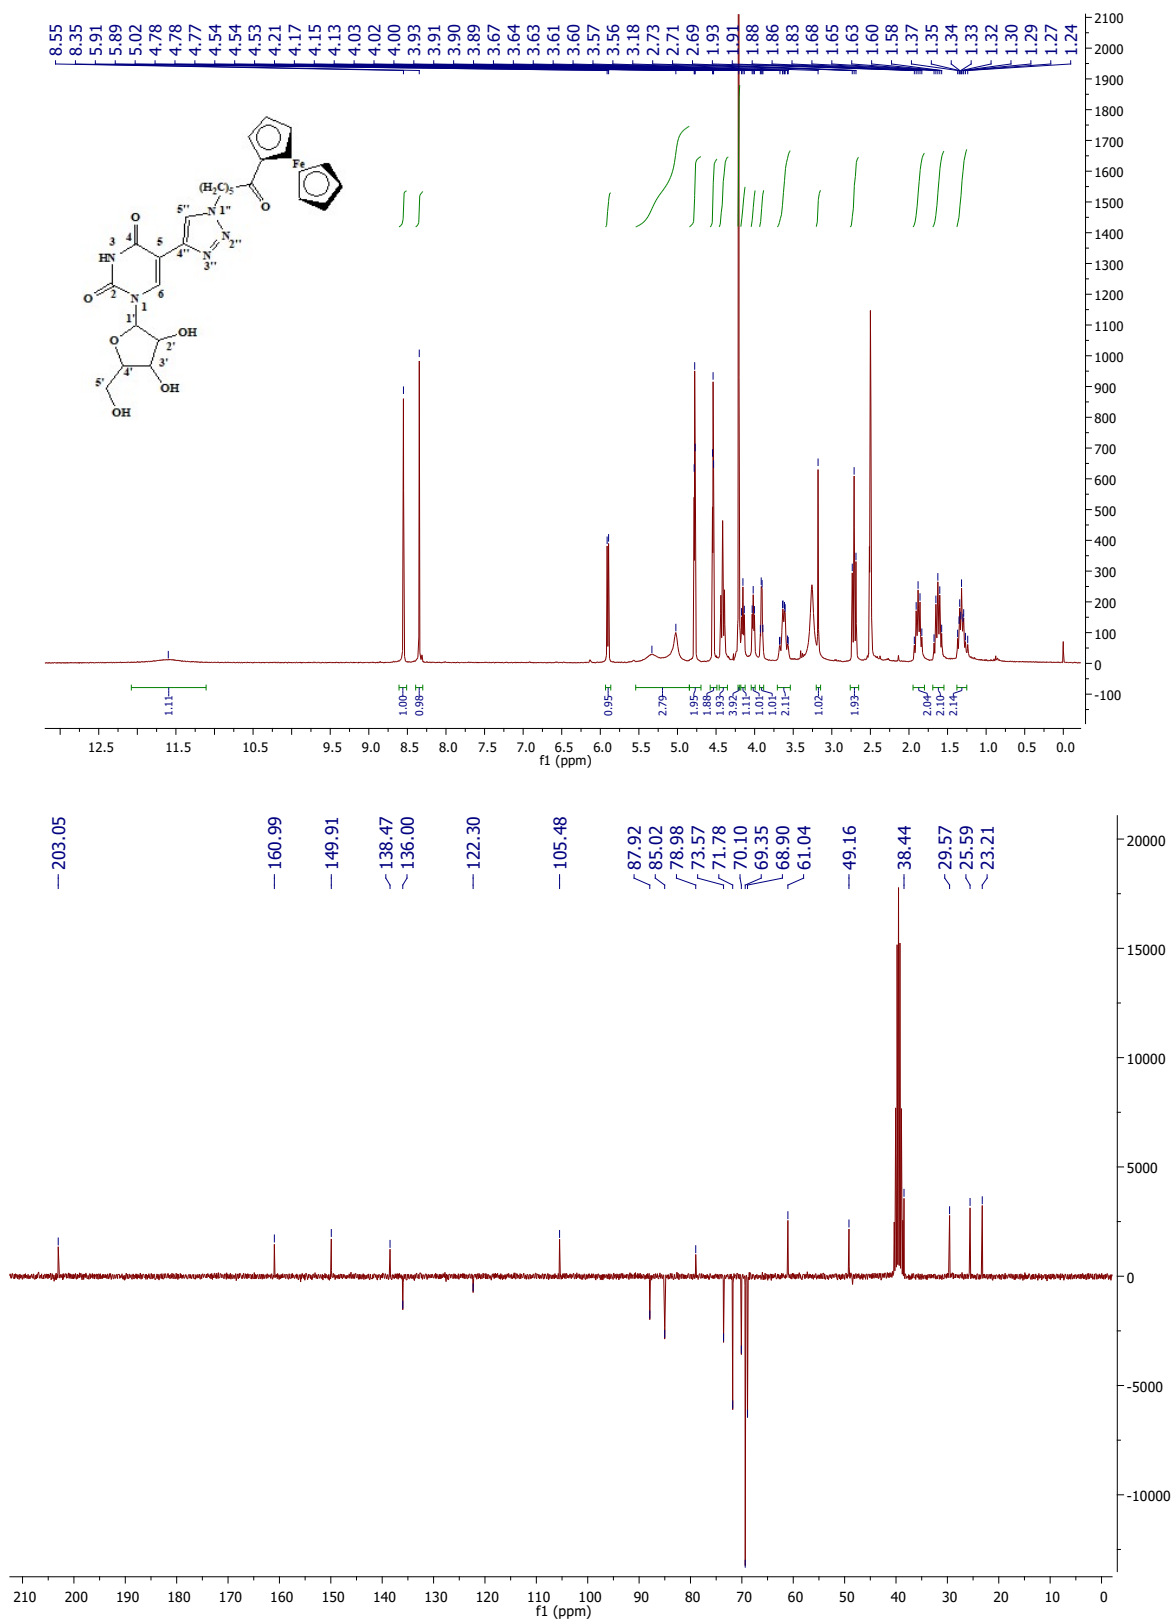

**Figure S6.** <sup>1</sup>H NMR (300 MHz, DMSO-*d*<sub>6</sub>) and <sup>13</sup>C NMR spectra (75 MHz, APT, DMSO-*d*<sub>6</sub>) of compound **12**.

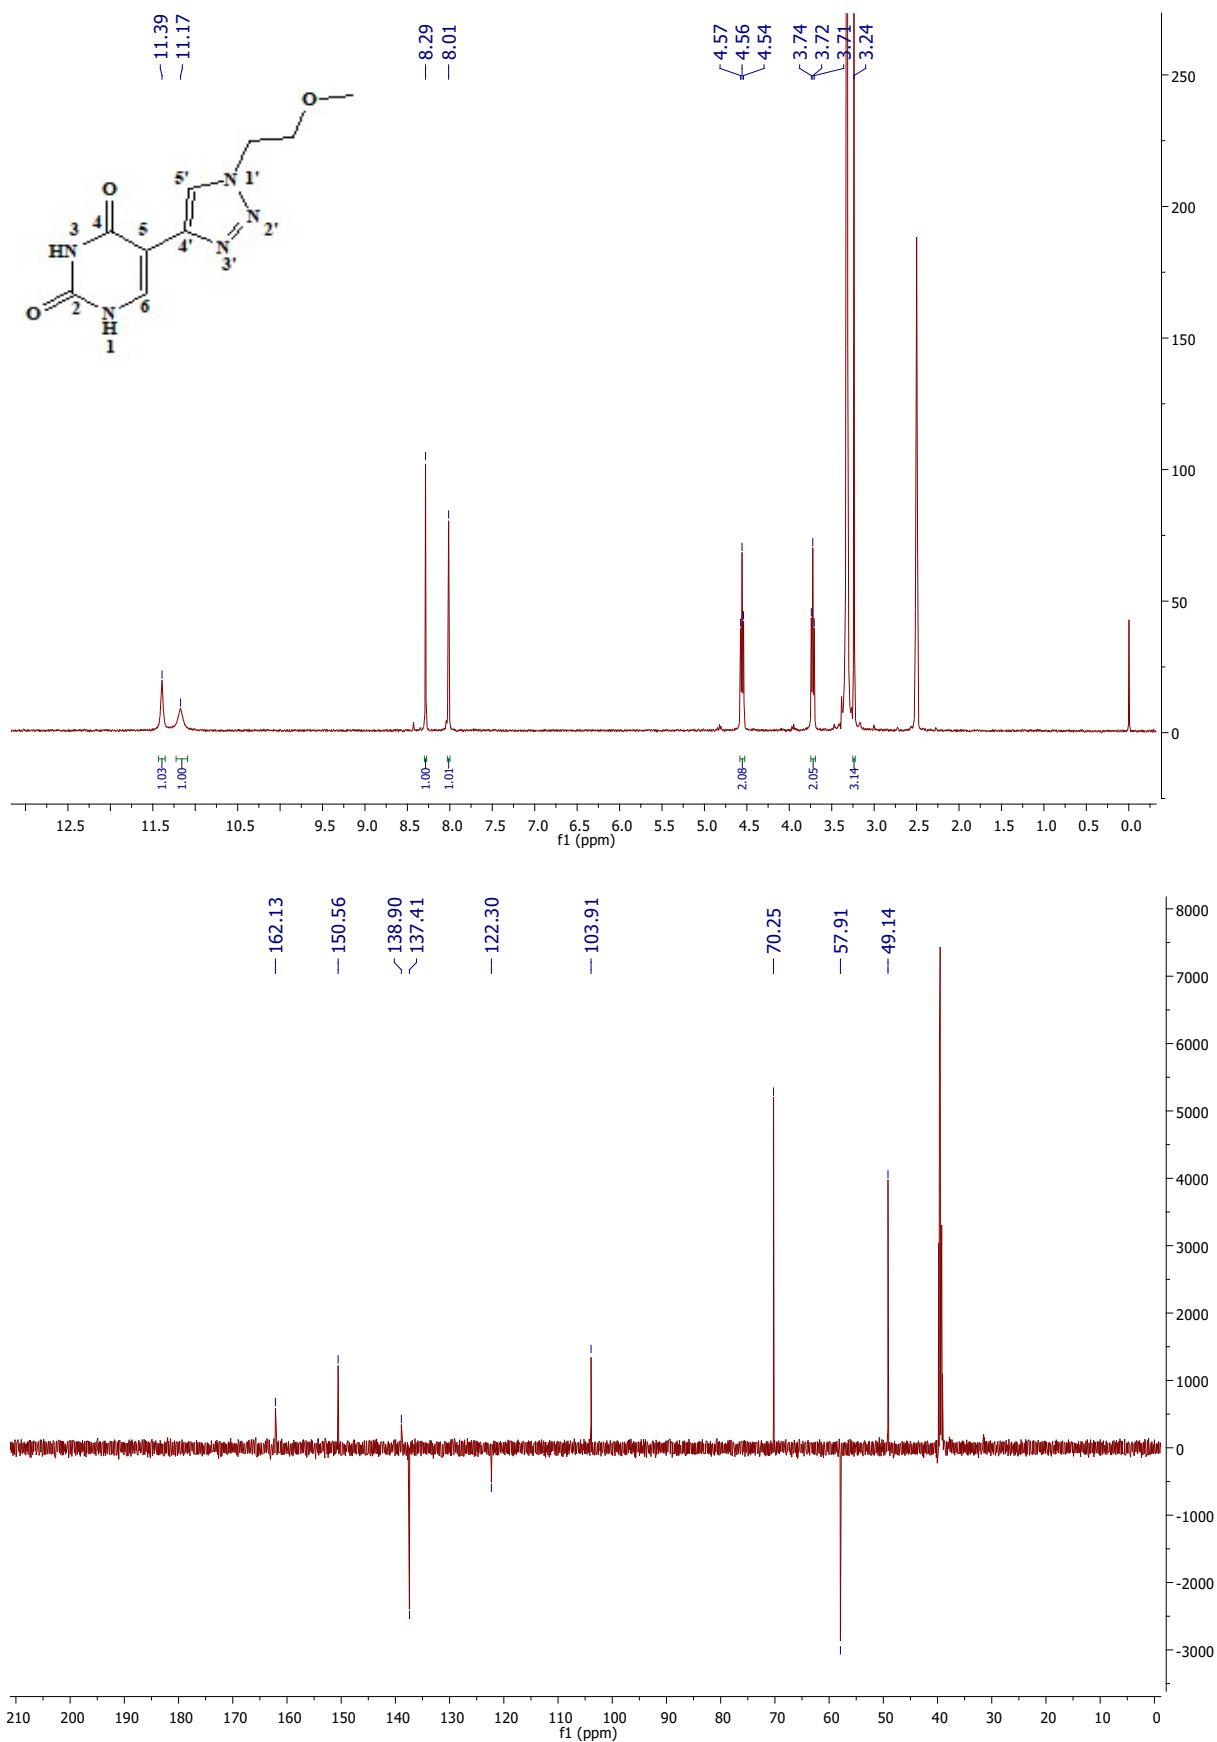

**Figure S7.** <sup>1</sup>H NMR (300 MHz, DMSO-*d*<sub>6</sub>) and <sup>13</sup>C NMR spectra (75 MHz, APT, DMSO-*d*<sub>6</sub>) of compound **13**.



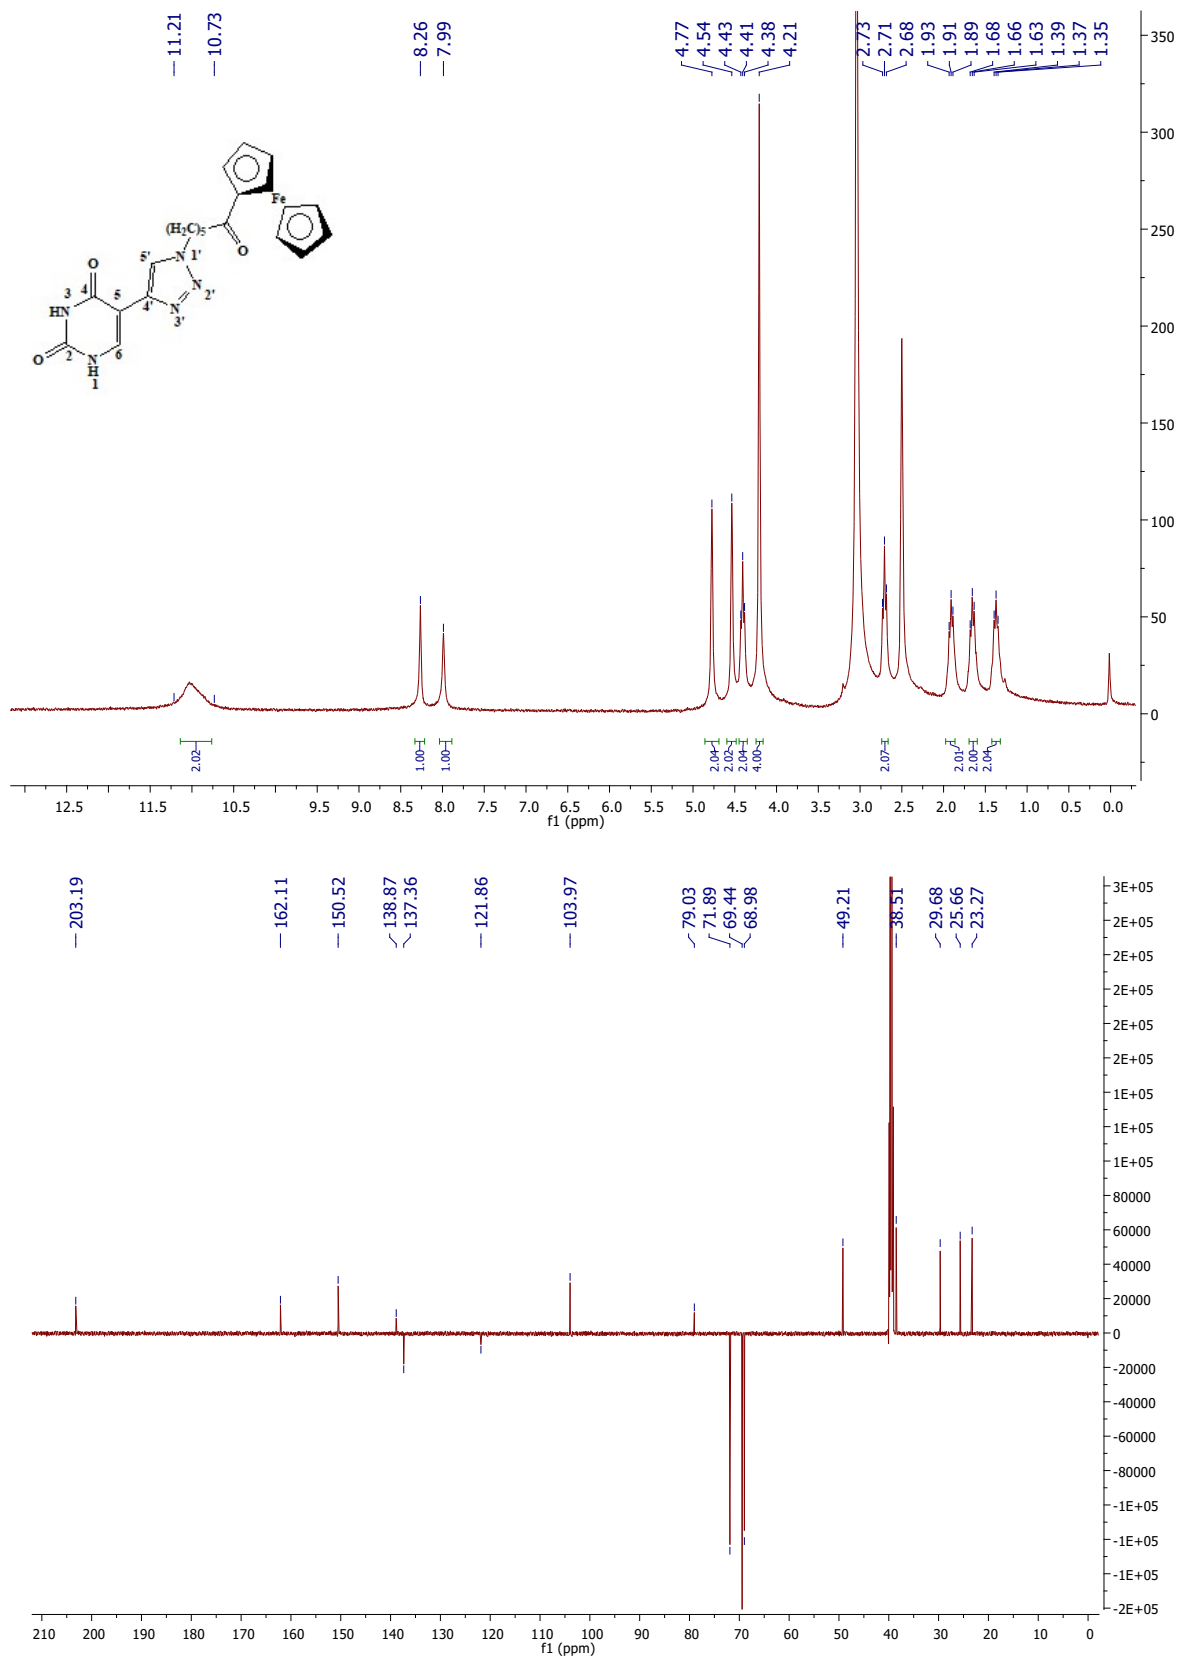

**Figure S8.** <sup>1</sup>H NMR (300 MHz, DMSO-*d*<sub>6</sub>) and <sup>13</sup>C NMR spectra (75 MHz, APT, DMSO-*d*<sub>6</sub>) of compound **14**.

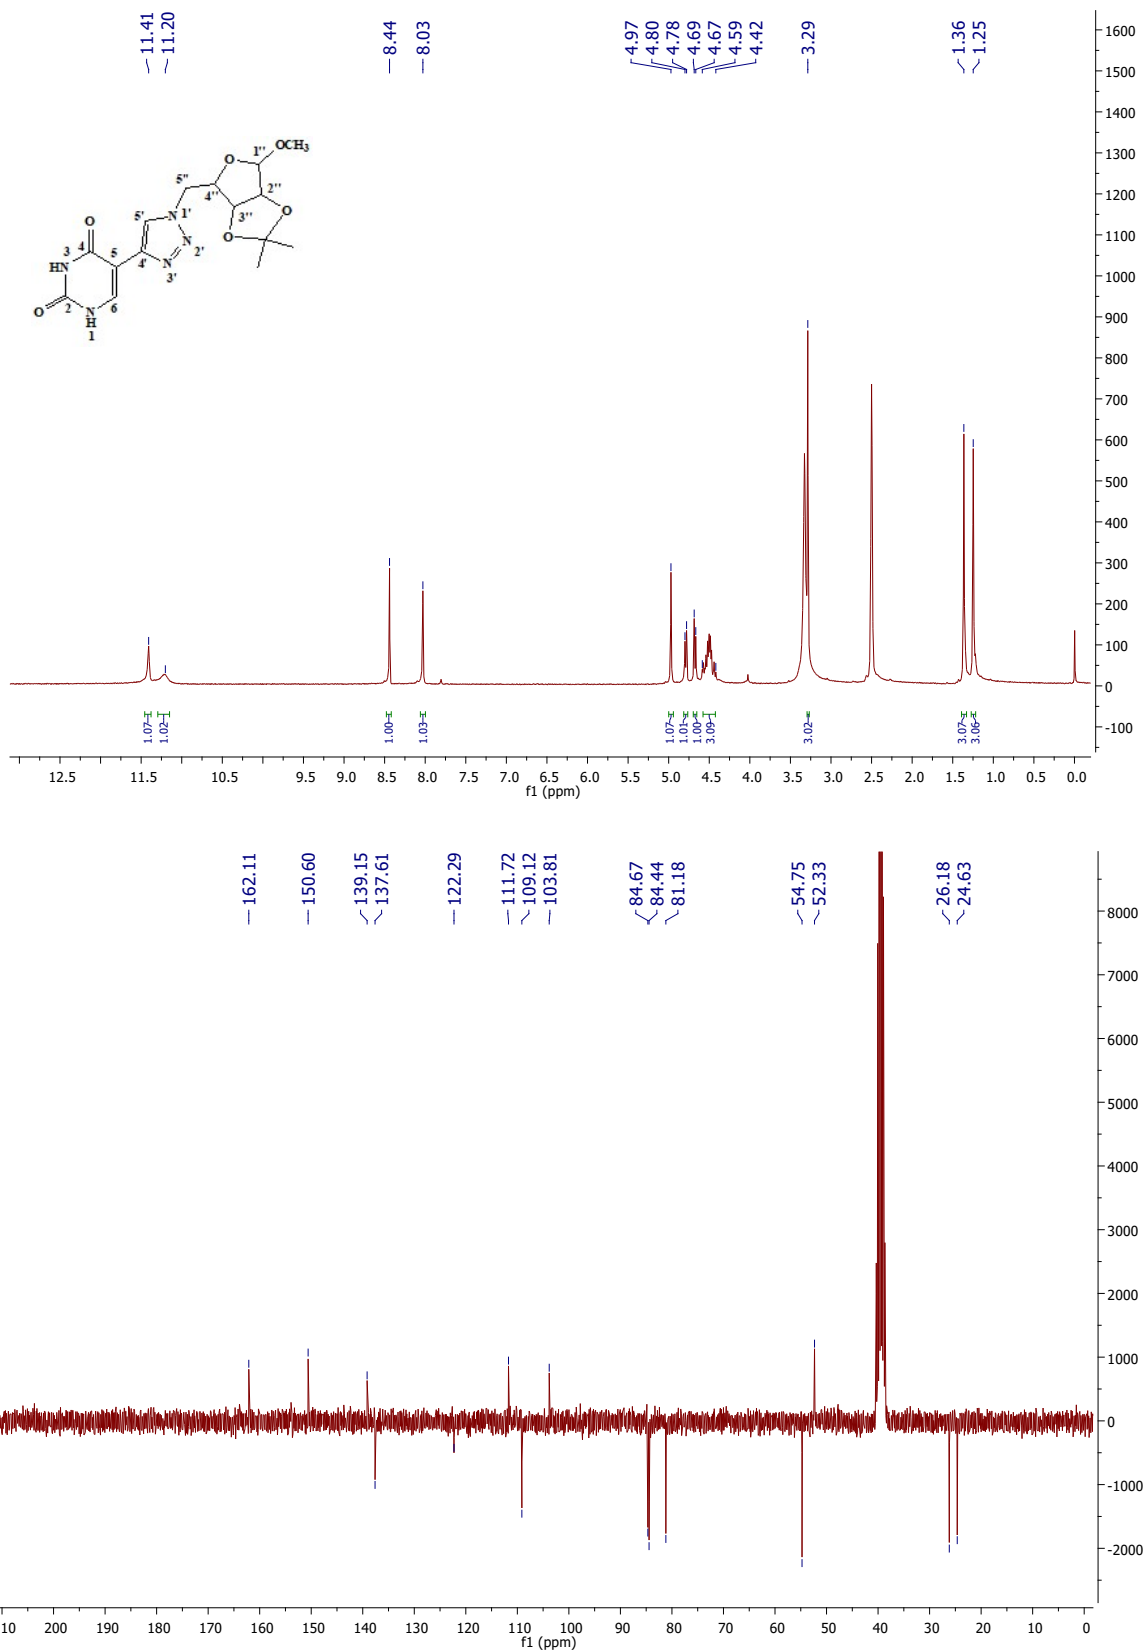

**Figure S9.** <sup>1</sup>H NMR (300 MHz, DMSO-*d*<sub>6</sub>) and <sup>13</sup>C NMR spectra (75 MHz, APT, DMSO-*d*<sub>6</sub>) of compound **16**.

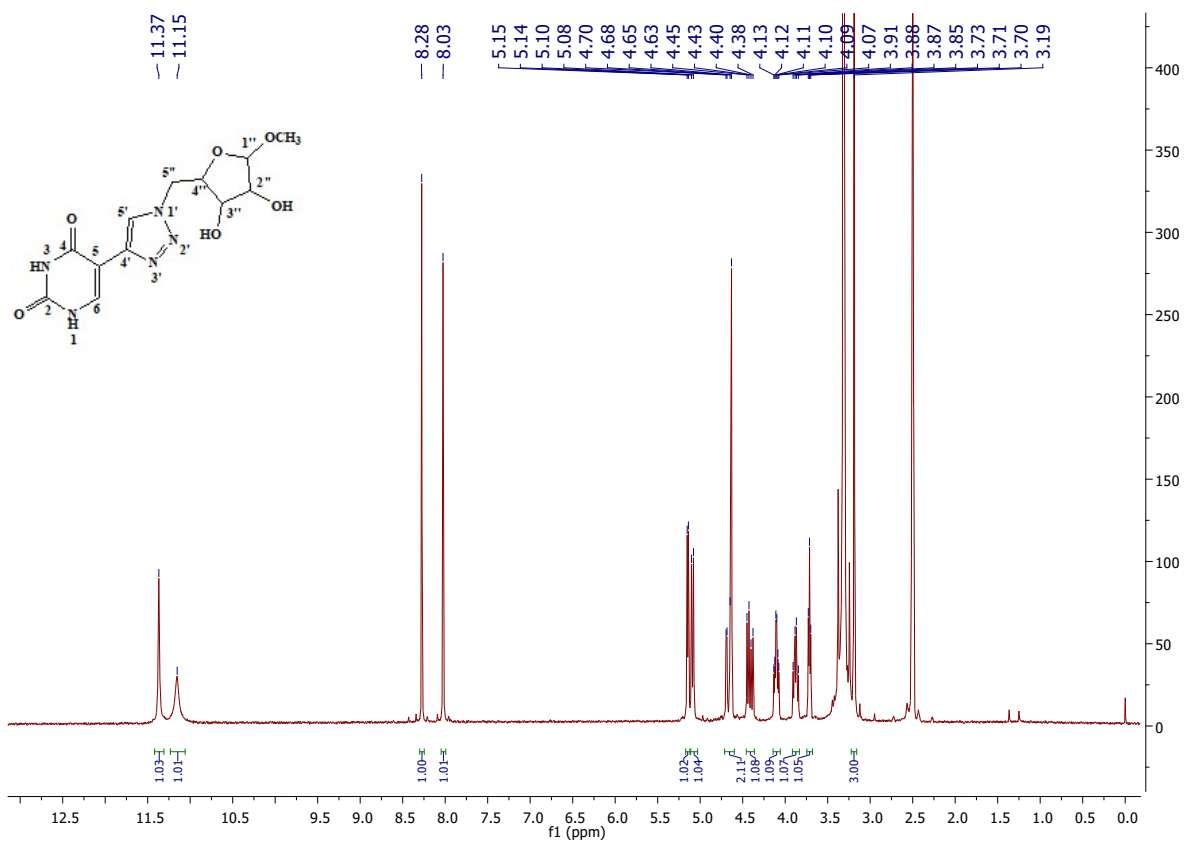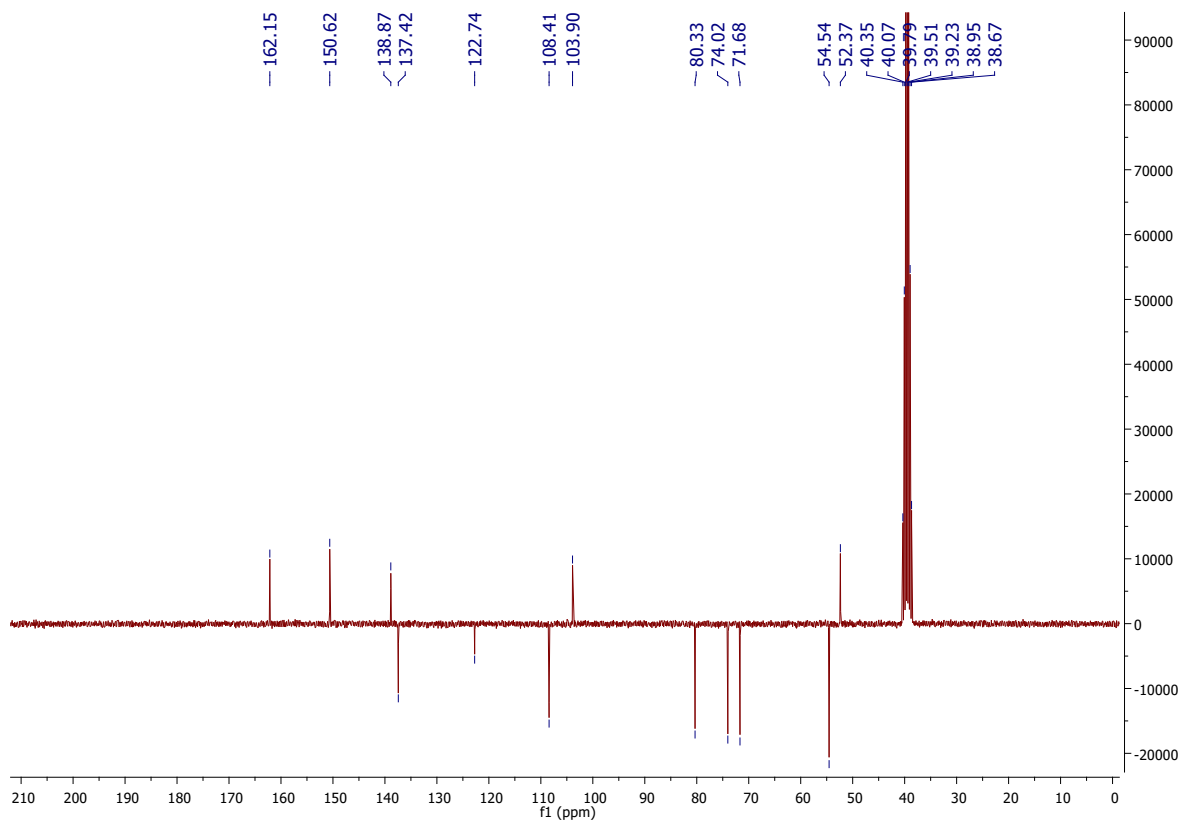

**Figure S10.** <sup>1</sup>H NMR (300 MHz, DMSO-*d*<sub>6</sub>) and <sup>13</sup>C NMR spectra (75 MHz, APT, DMSO-*d*<sub>6</sub>) of compound **17**.

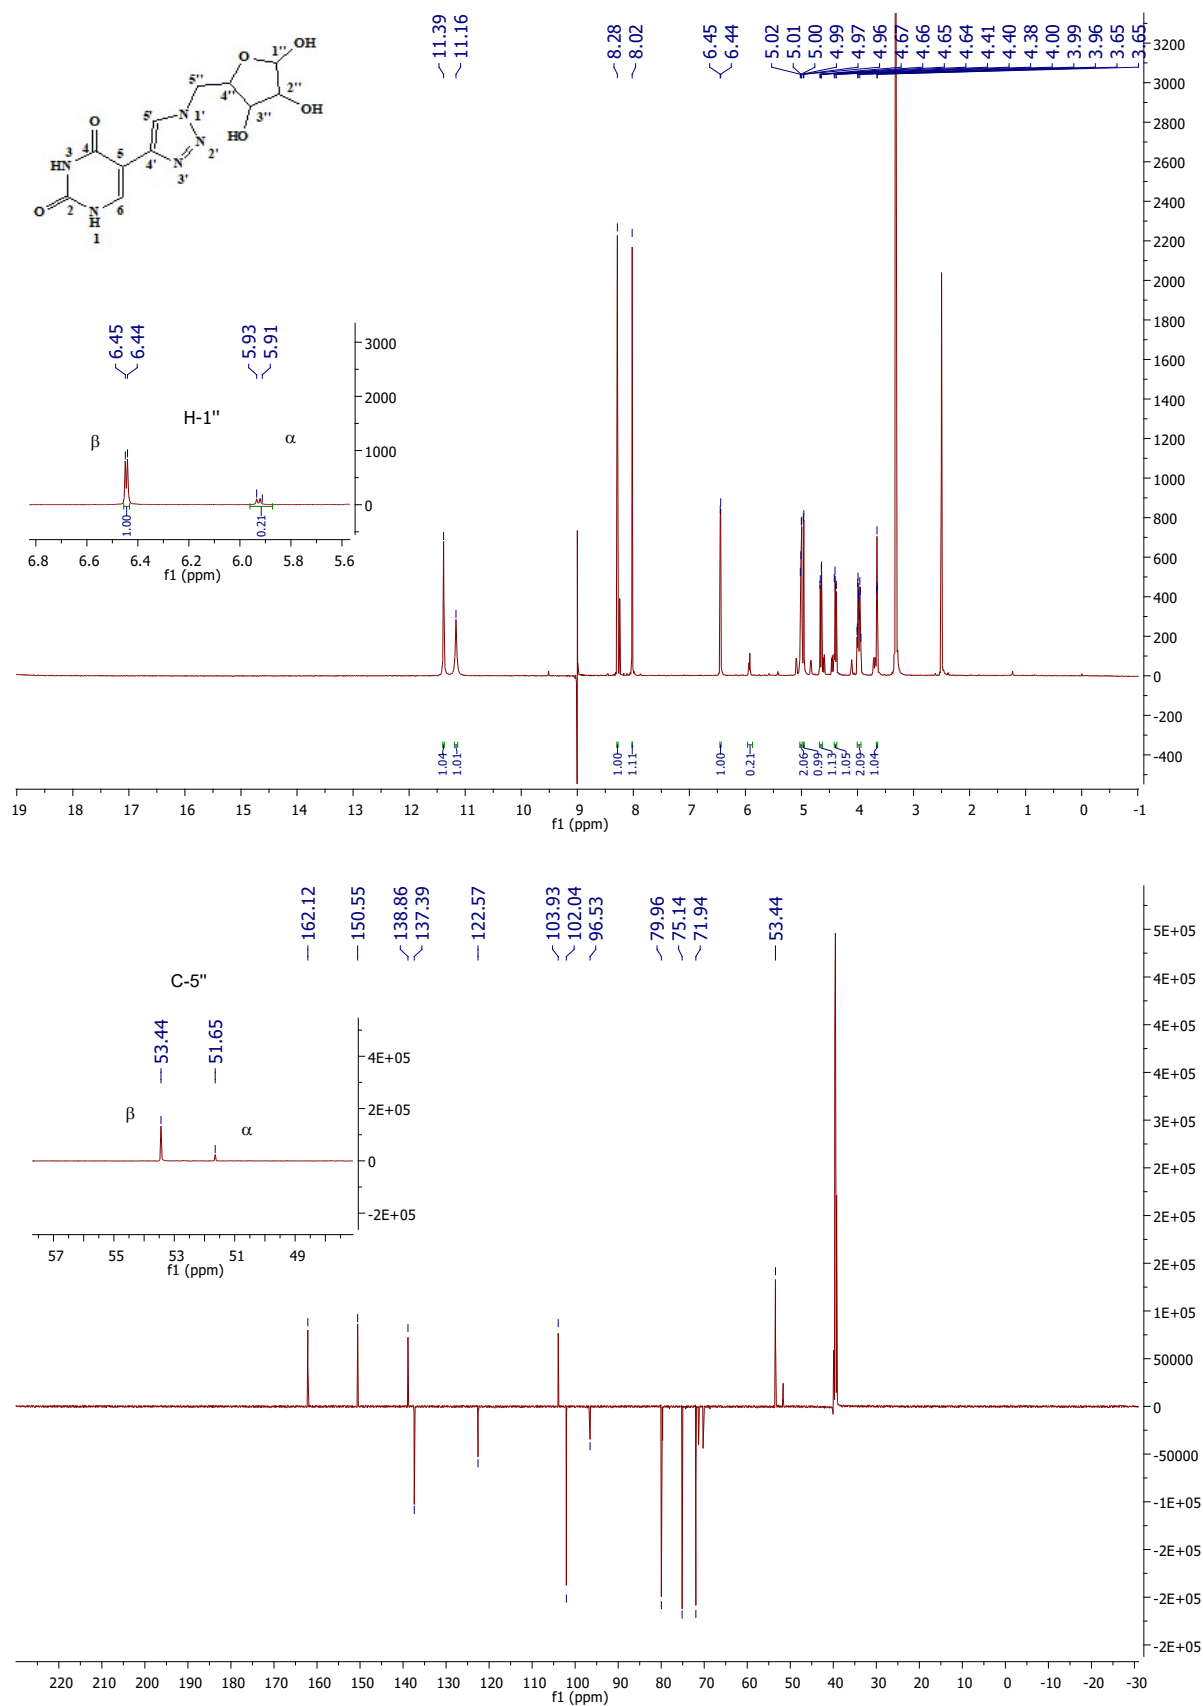

**Figure S11.** <sup>1</sup>H NMR (300 MHz, DMSO-*d*<sub>6</sub>) and <sup>13</sup>C NMR spectra (75 MHz, APT, DMSO-*d*<sub>6</sub>) of compound **18**.

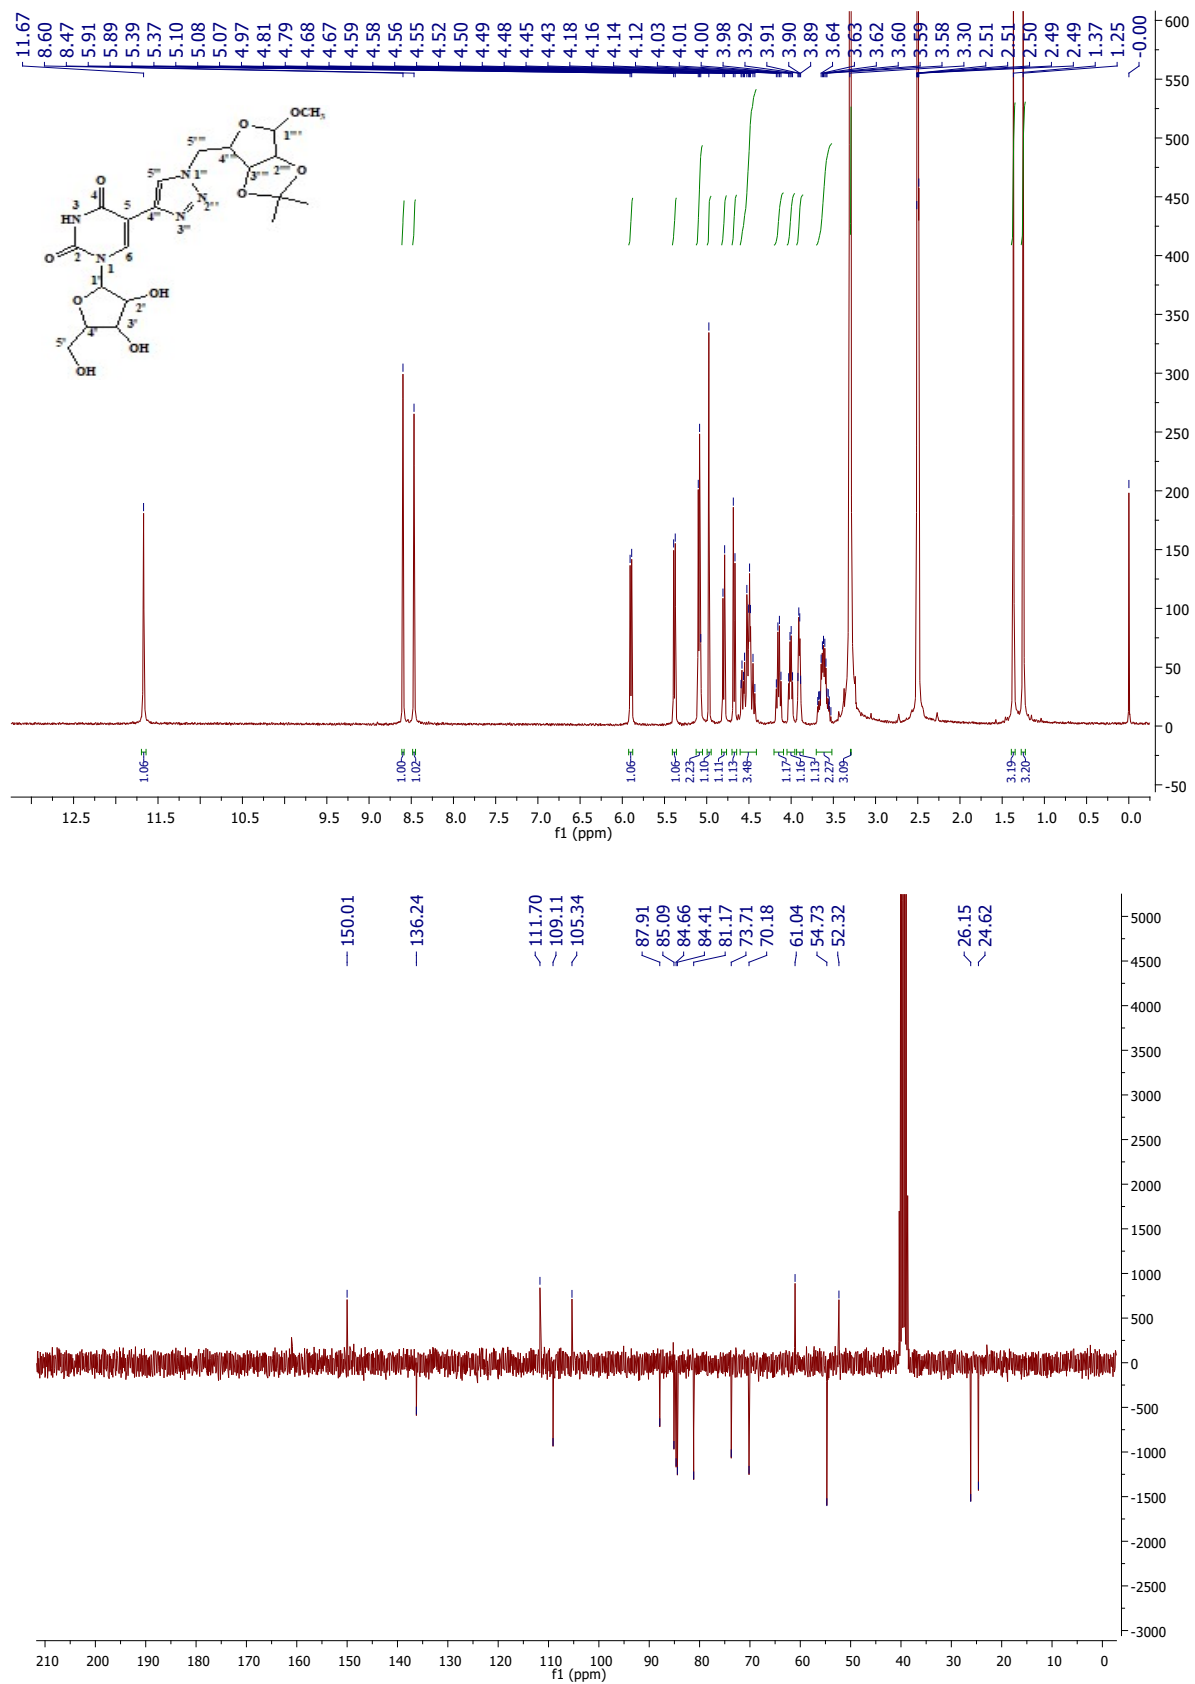

**Figure S12.** <sup>1</sup>H NMR (300 MHz, DMSO-*d*<sub>6</sub>) and <sup>13</sup>C NMR spectra (75 MHz, APT, DMSO-*d*<sub>6</sub>) of compound **19**.

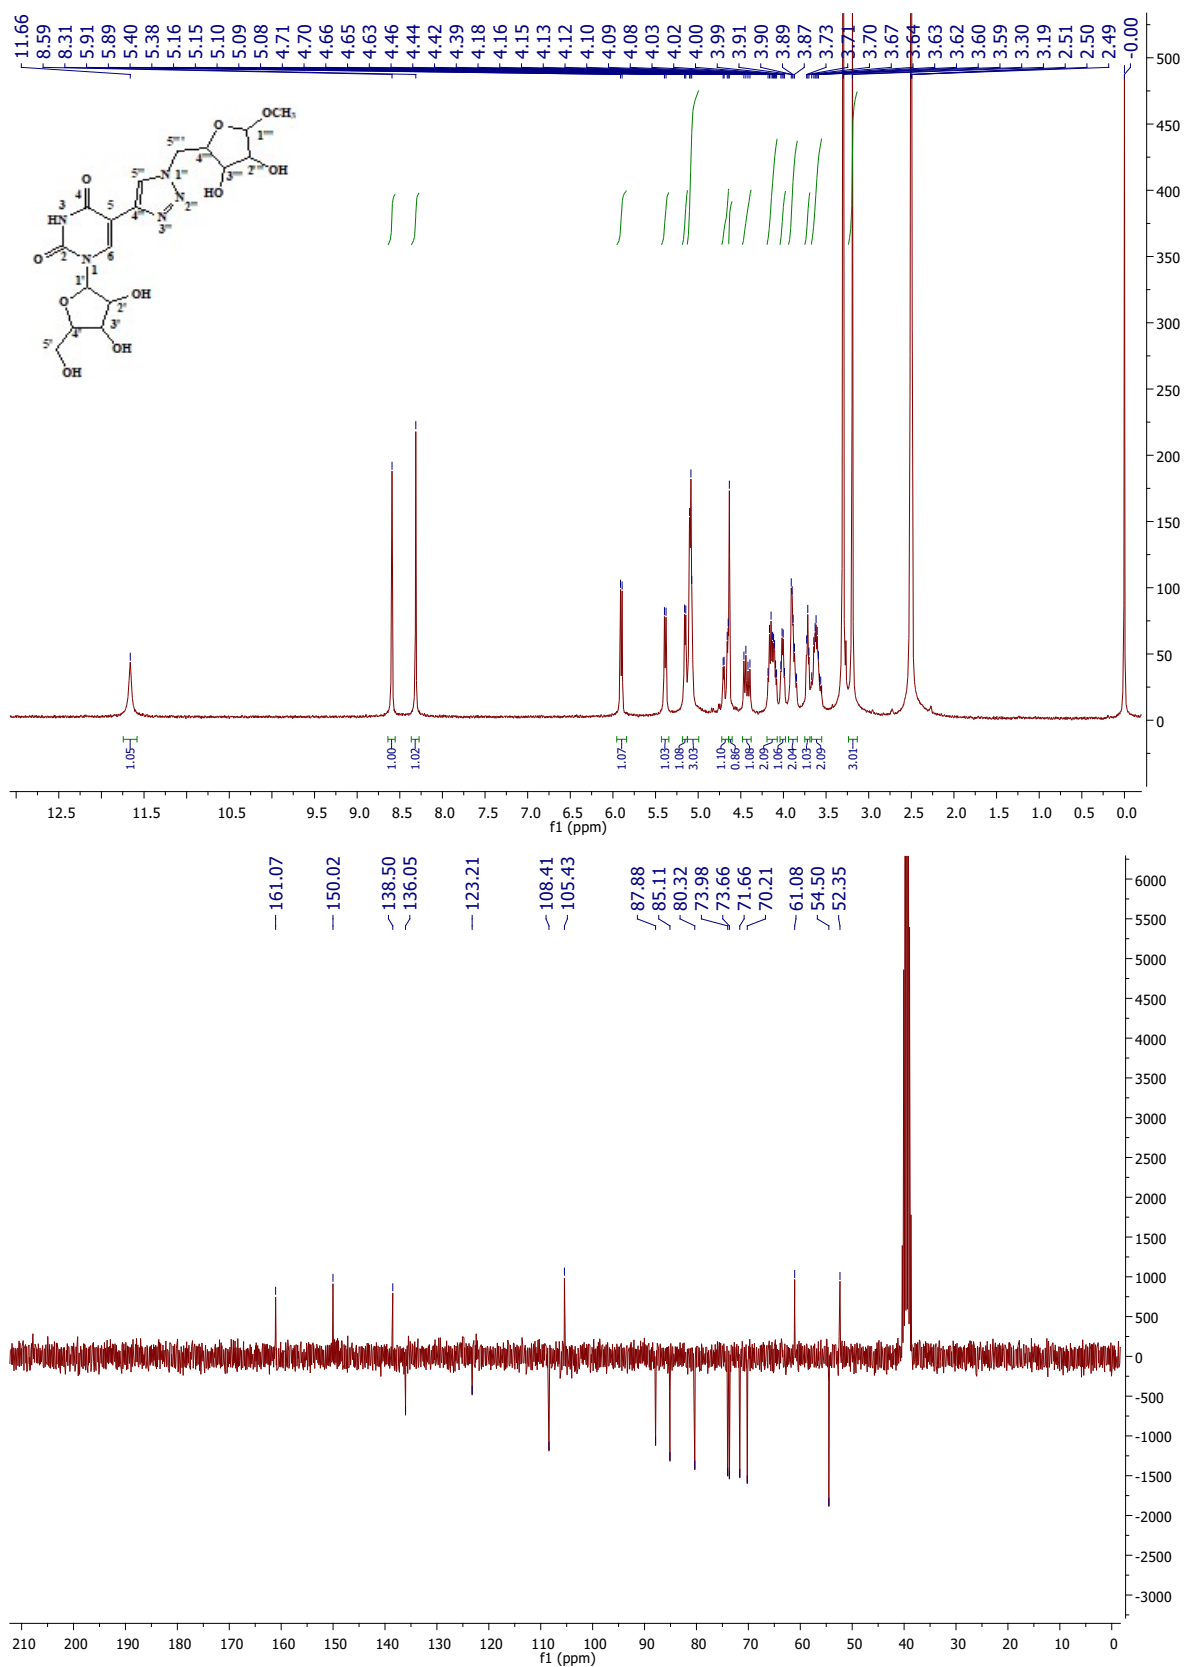

**Figure S13.** <sup>1</sup>H NMR (300 MHz, DMSO-*d*<sub>6</sub>) and <sup>13</sup>C NMR spectra (75 MHz, APT, DMSO-*d*<sub>6</sub>) of compound **20**.

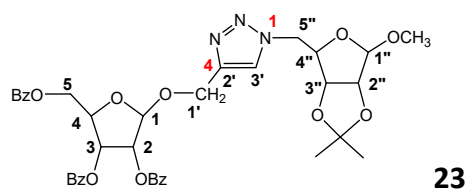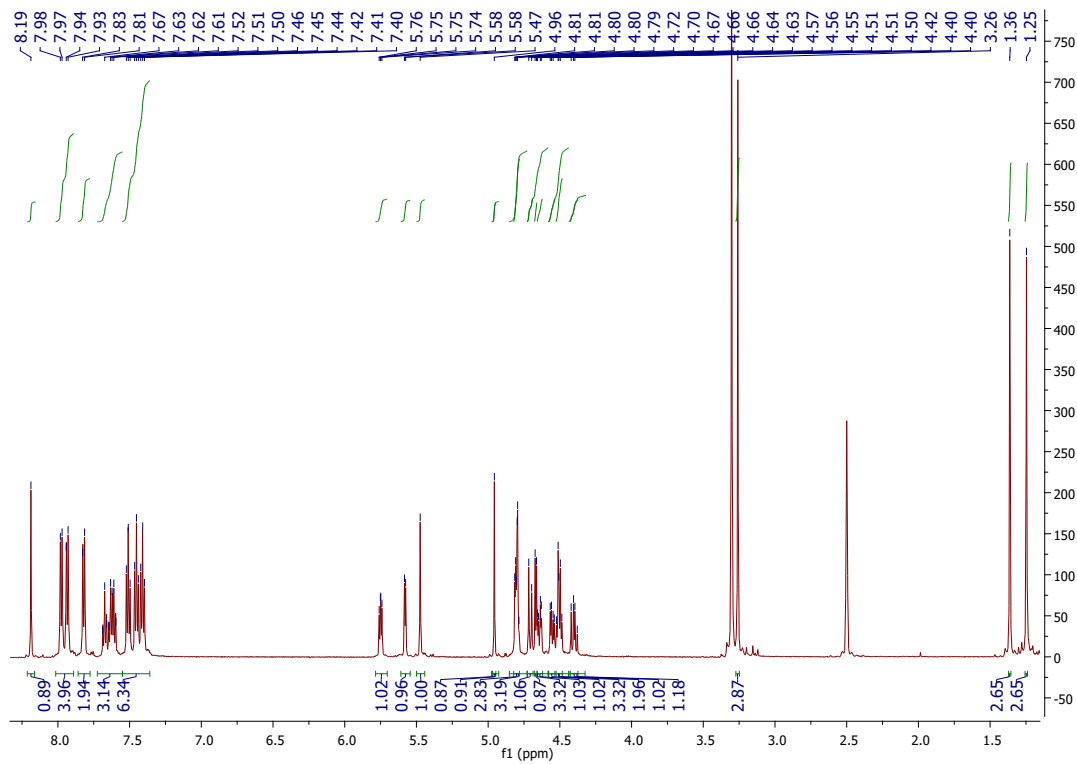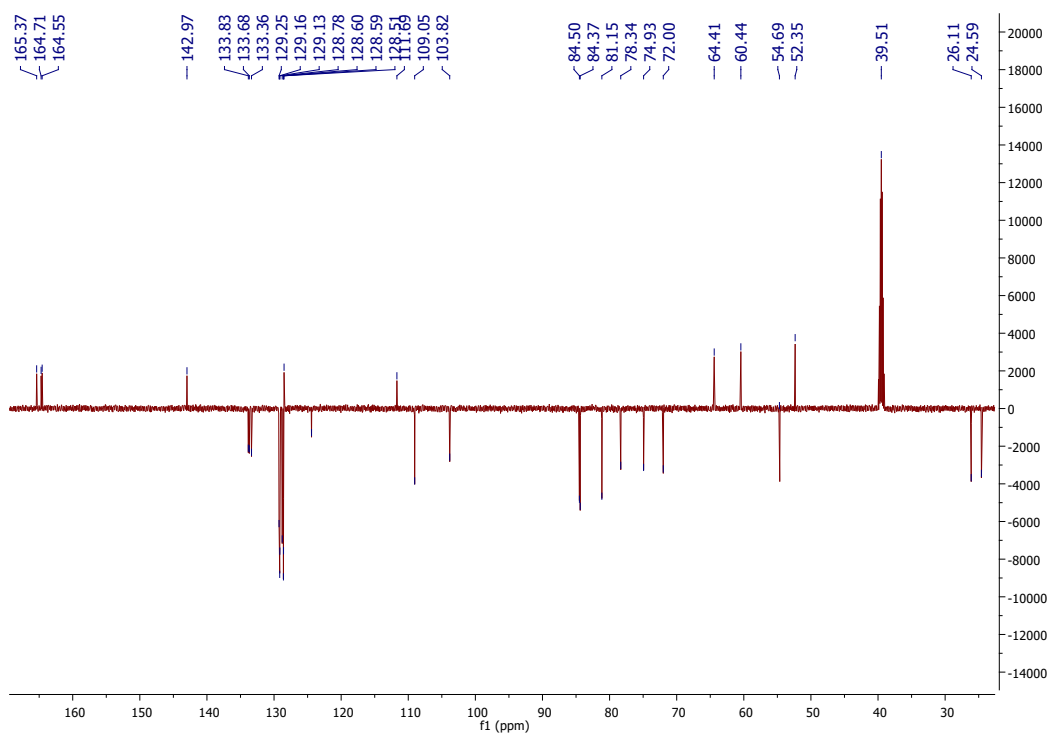

**Figure S14.** <sup>1</sup>H NMR (600 MHz, DMSO-*d*<sub>6</sub>) and <sup>13</sup>C NMR (151 MHz, APT, DMSO-*d*<sub>6</sub>) spectra of compound **23**.

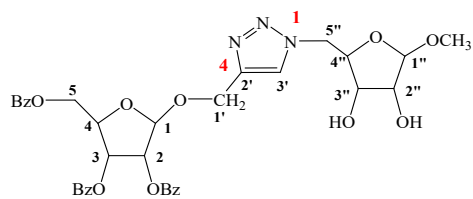

24

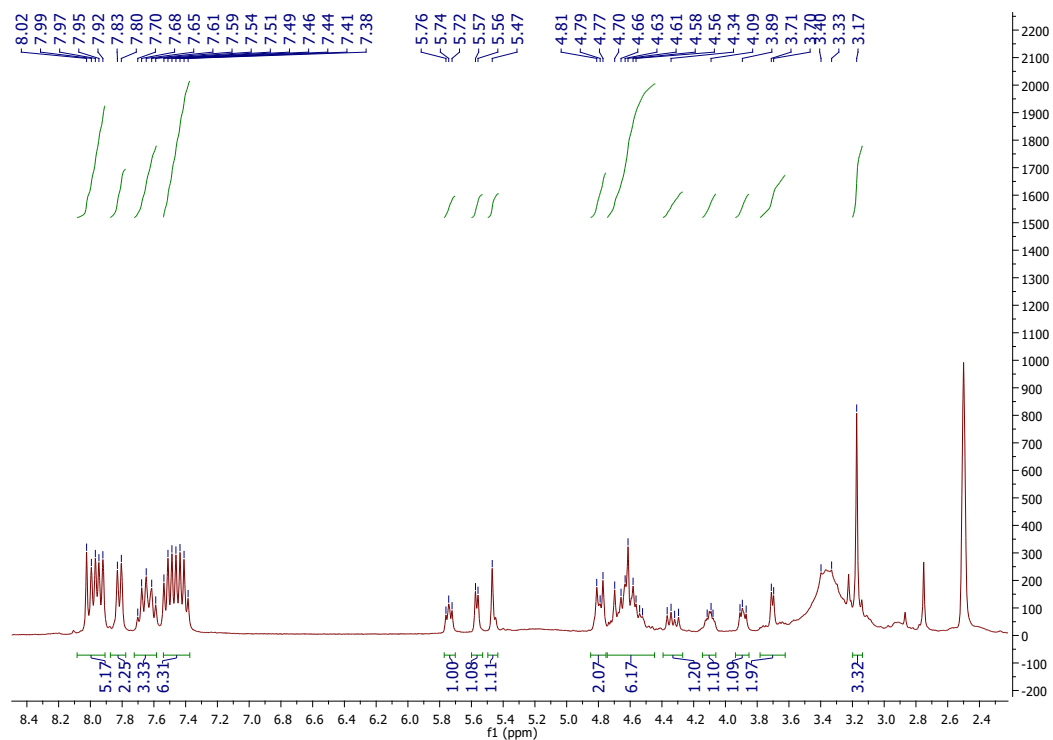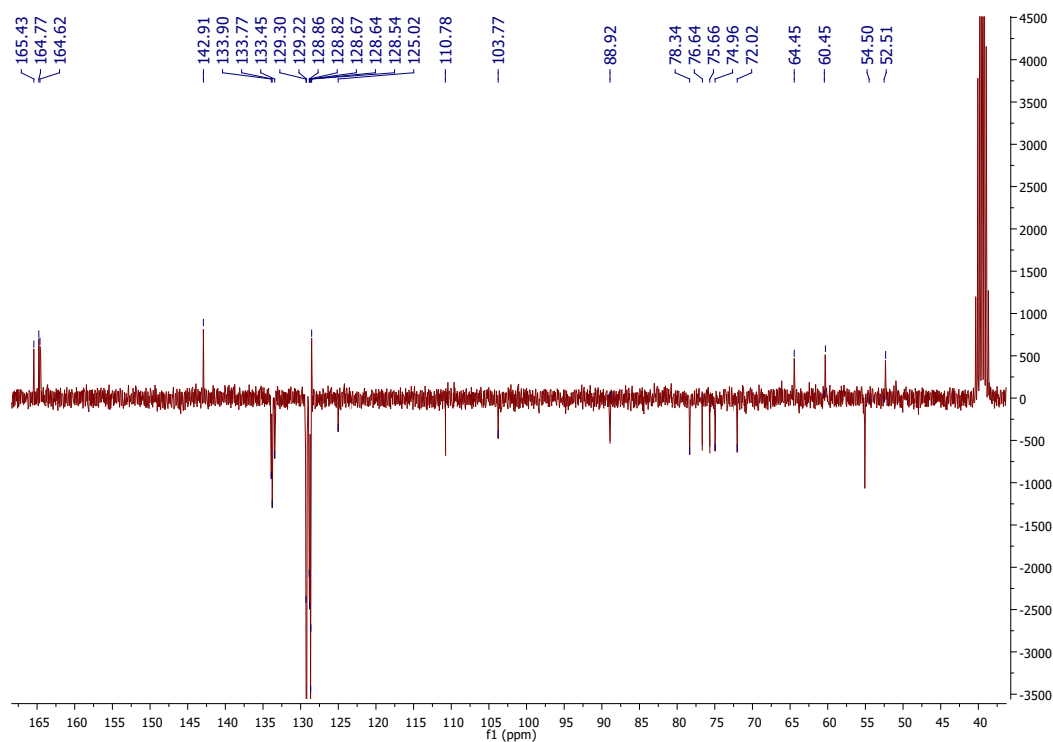

Figure S15.  $^1\text{H}$  NMR (300 MHz,  $\text{DMSO-}d_6$ ) and  $^{13}\text{C}$  NMR (75 MHz, APT,  $\text{DMSO-}d_6$ ) spectra of compound 24.



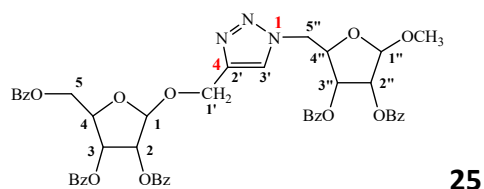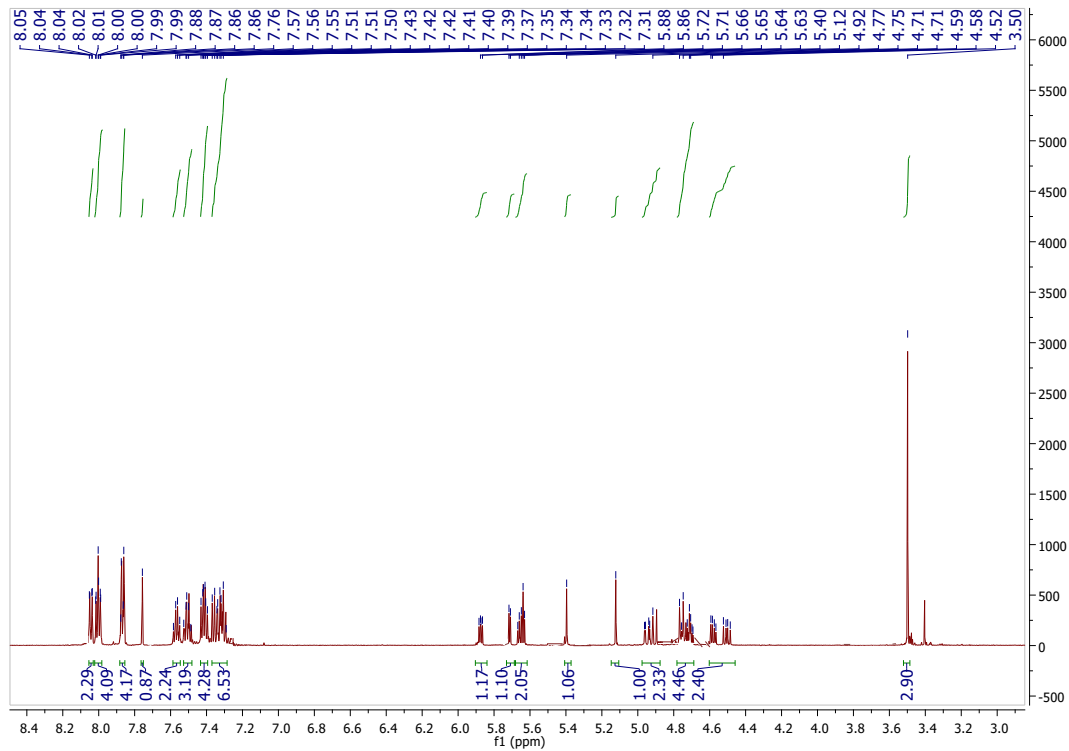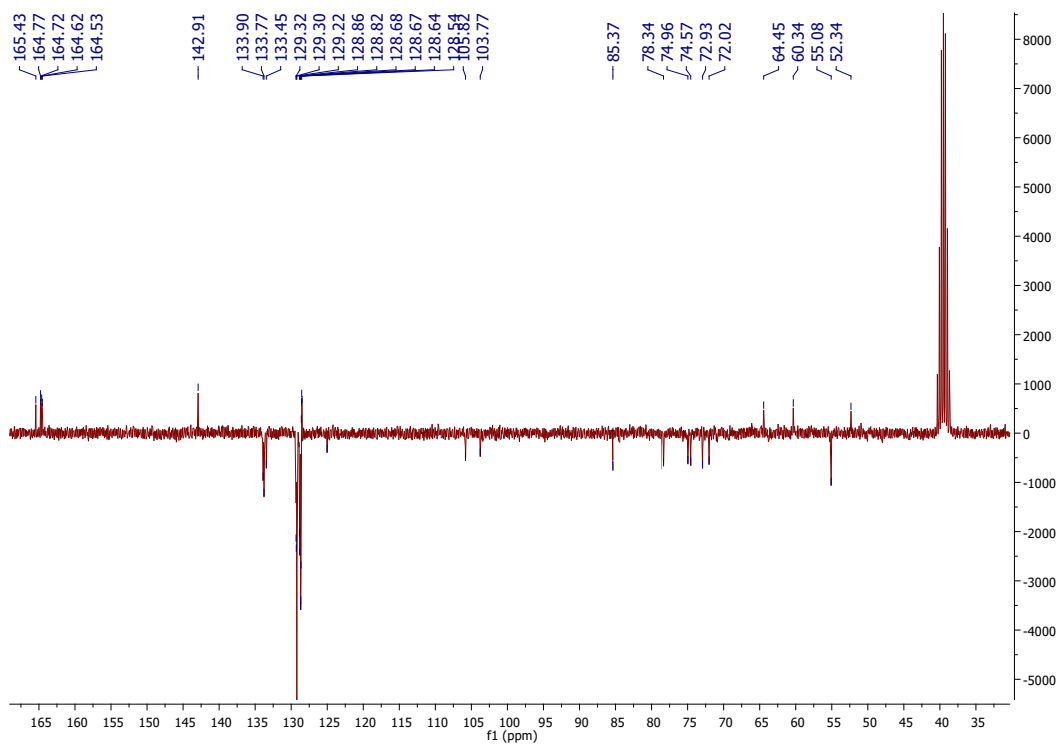

**Figure 16.** <sup>1</sup>H NMR (600 MHz, DMSO-*d*<sub>6</sub>) and <sup>13</sup>C NMR (75 MHz, APT, DMSO-*d*<sub>6</sub>) spectra of compound **25**.

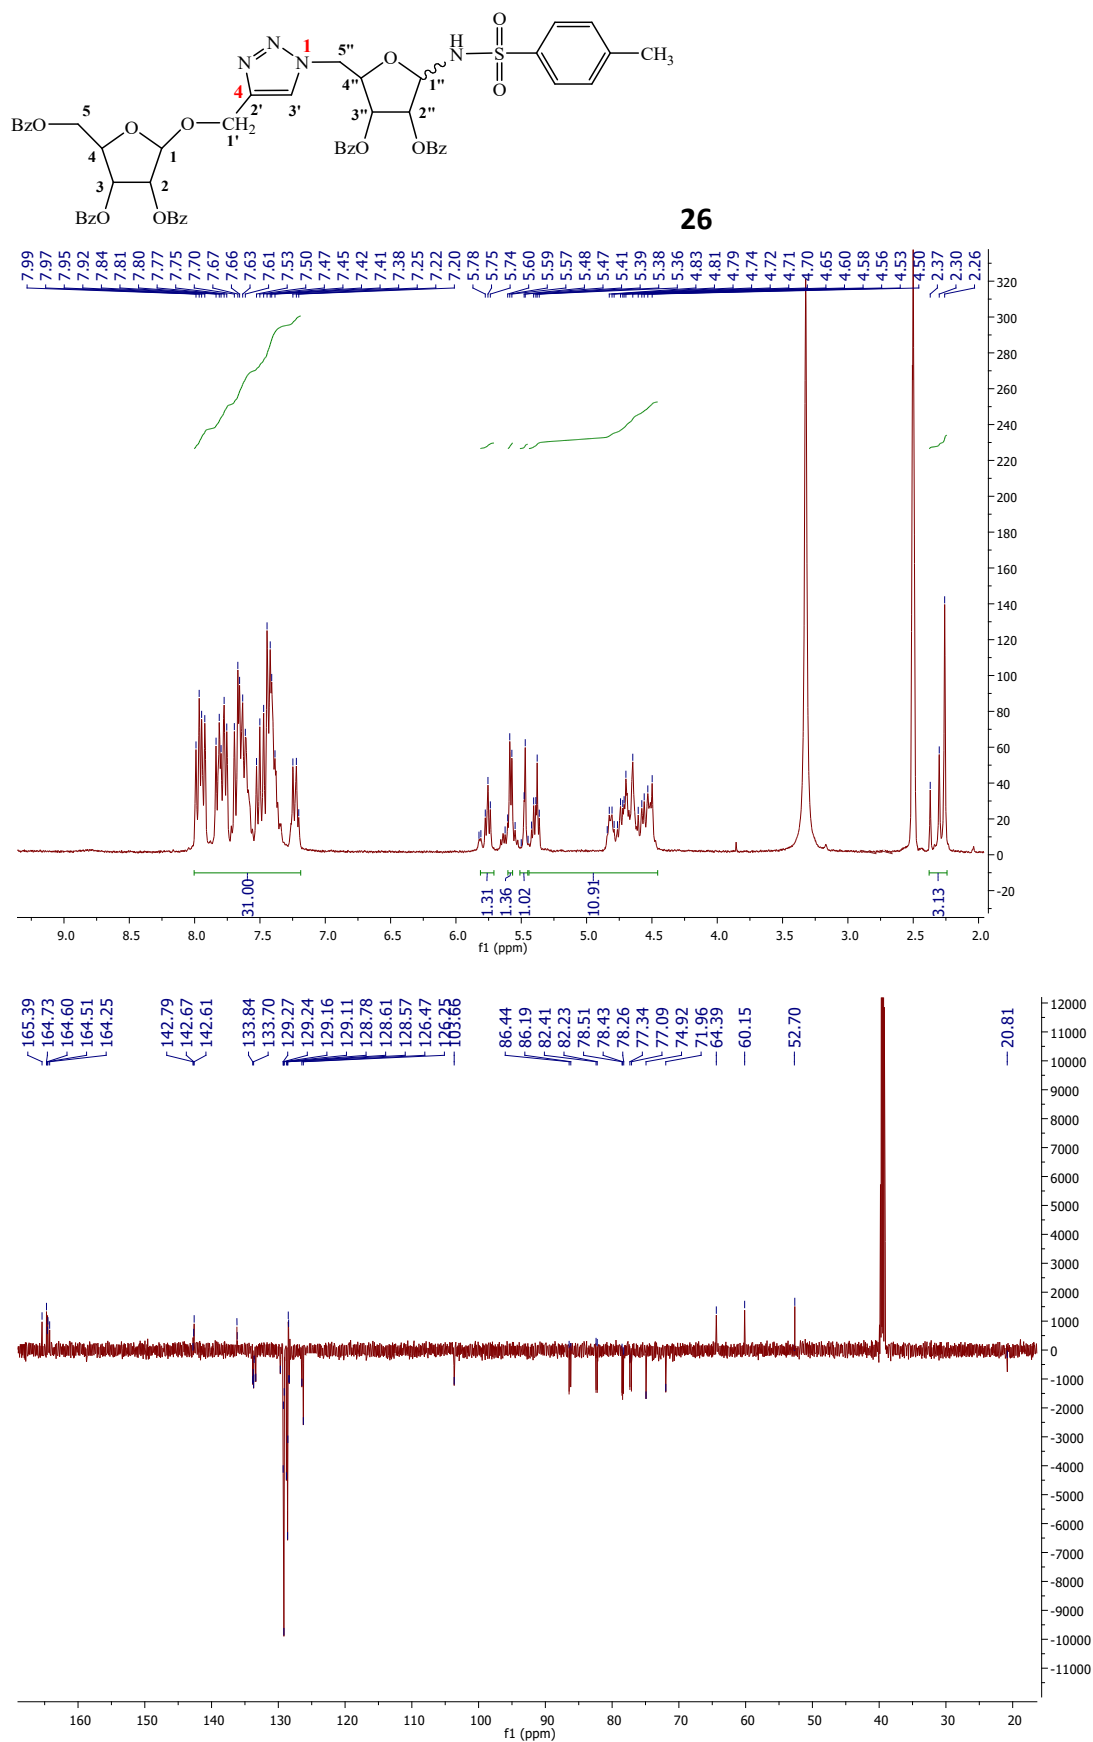

**Figure S17.** <sup>1</sup>H NMR (300 MHz, DMSO-*d*<sub>6</sub>) and <sup>13</sup>C NMR (151 MHz, APT, DMSO-*d*<sub>6</sub>) spectra of compound **26**.

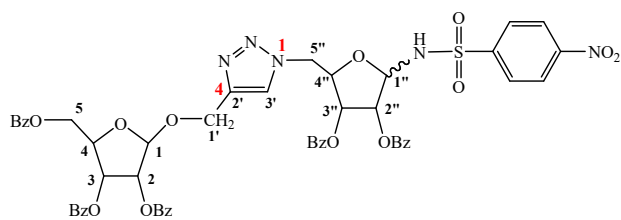

27

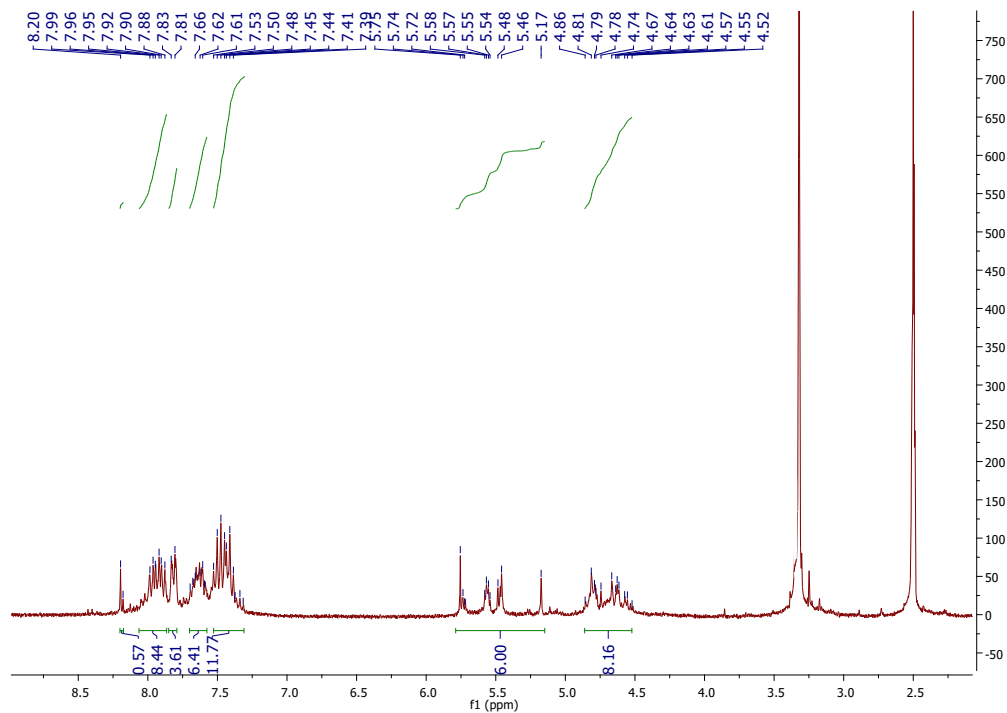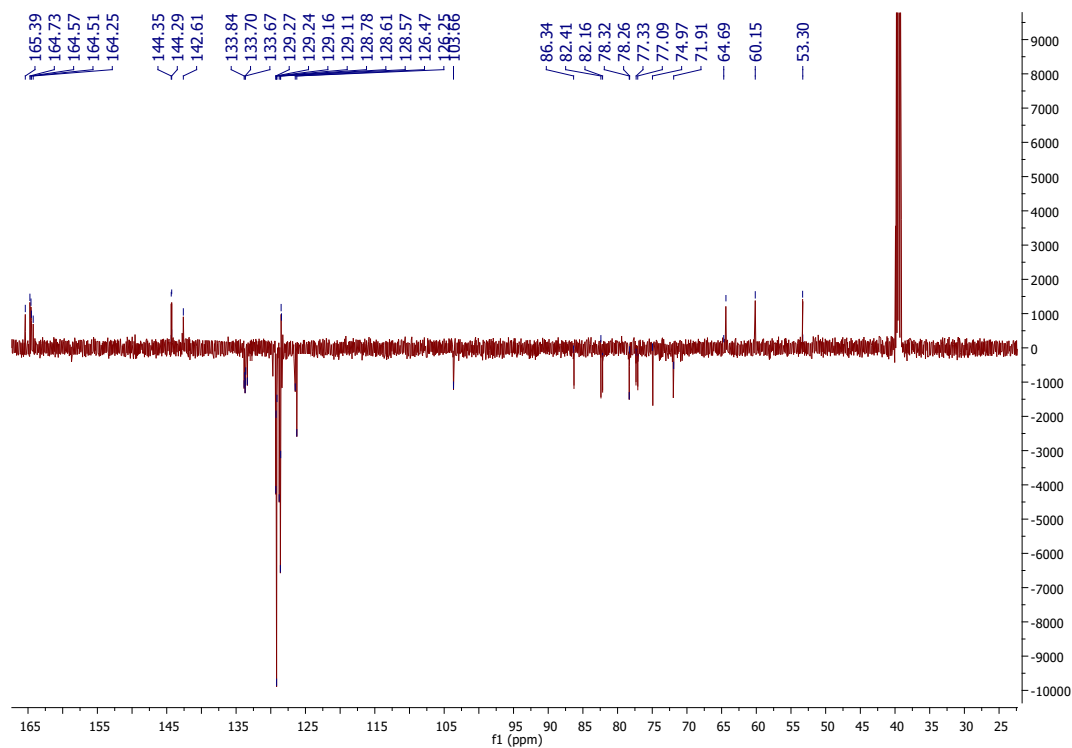

Figure S18.  $^1\text{H}$  NMR (300 MHz,  $\text{DMSO-}d_6$ ) and  $^{13}\text{C}$  NMR (75 MHz, APT,  $\text{DMSO-}d_6$ ) spectra of compound 27.

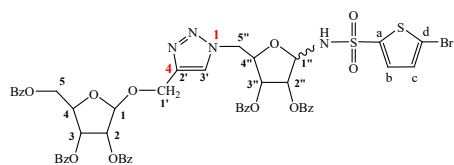

28

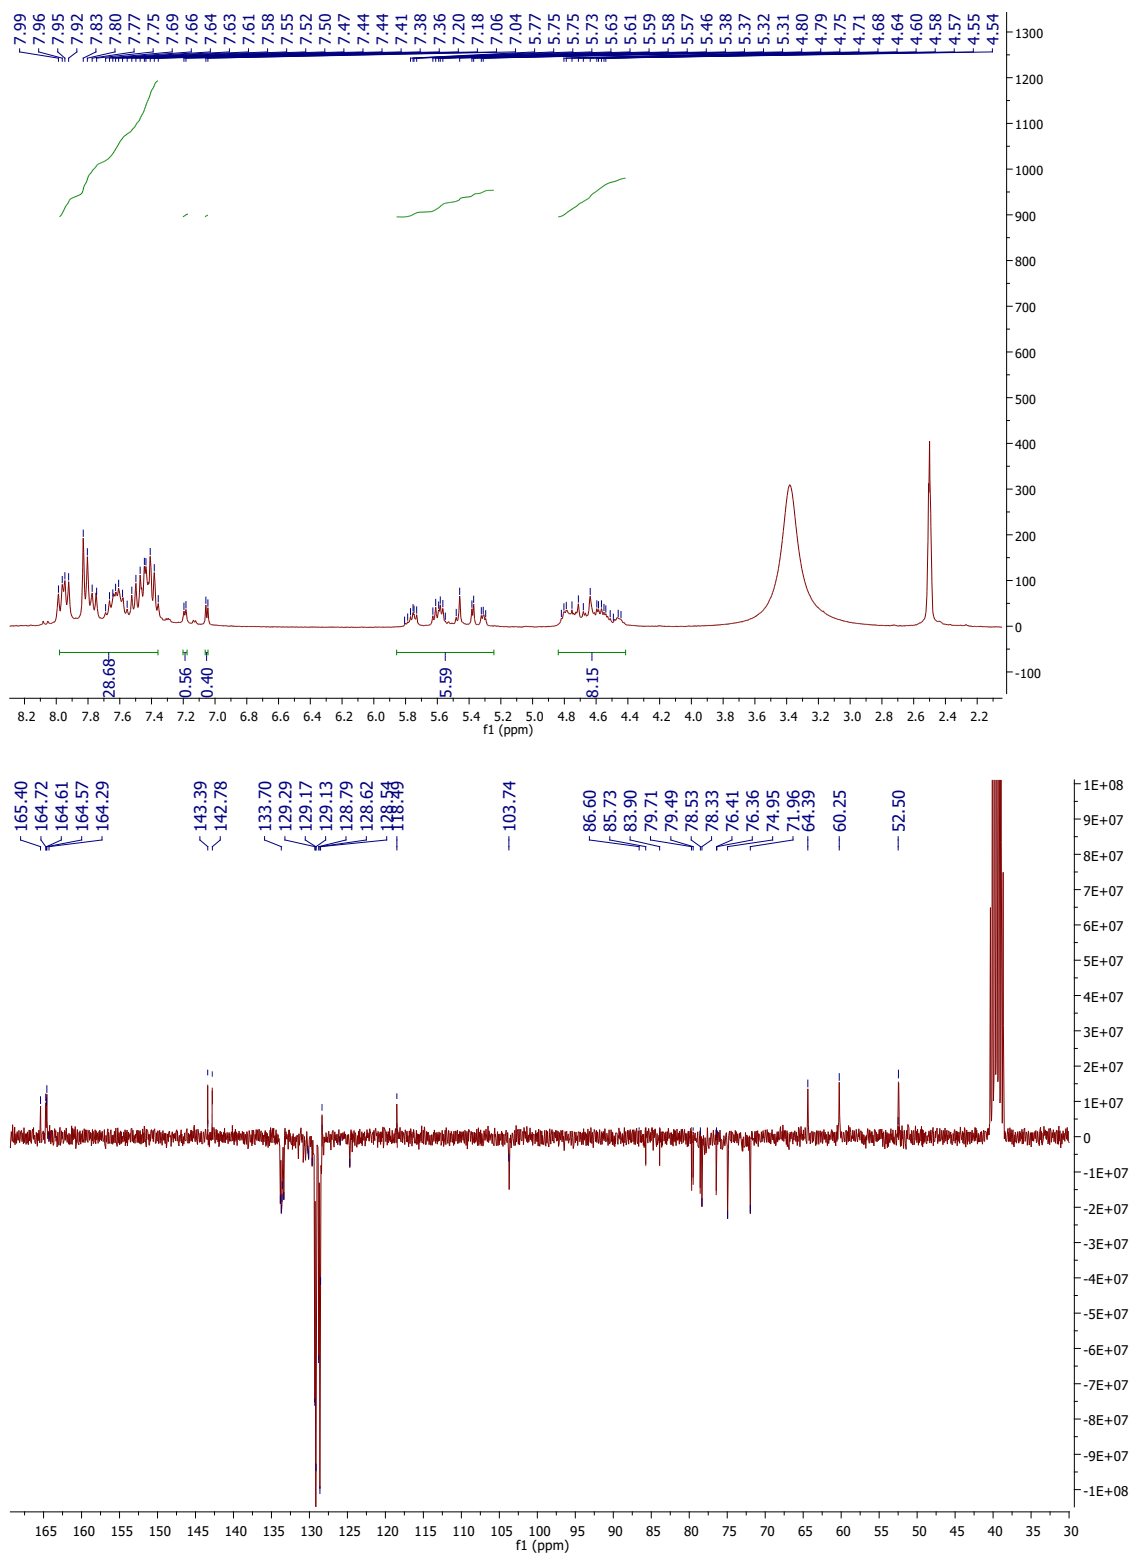

**Figure S19.** <sup>1</sup>H NMR (300 MHz, DMSO-*d*<sub>6</sub>) and <sup>13</sup>C NMR (151 MHz, APT, DMSO-*d*<sub>6</sub>) spectra of compound **28**.

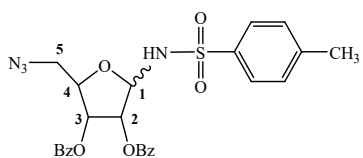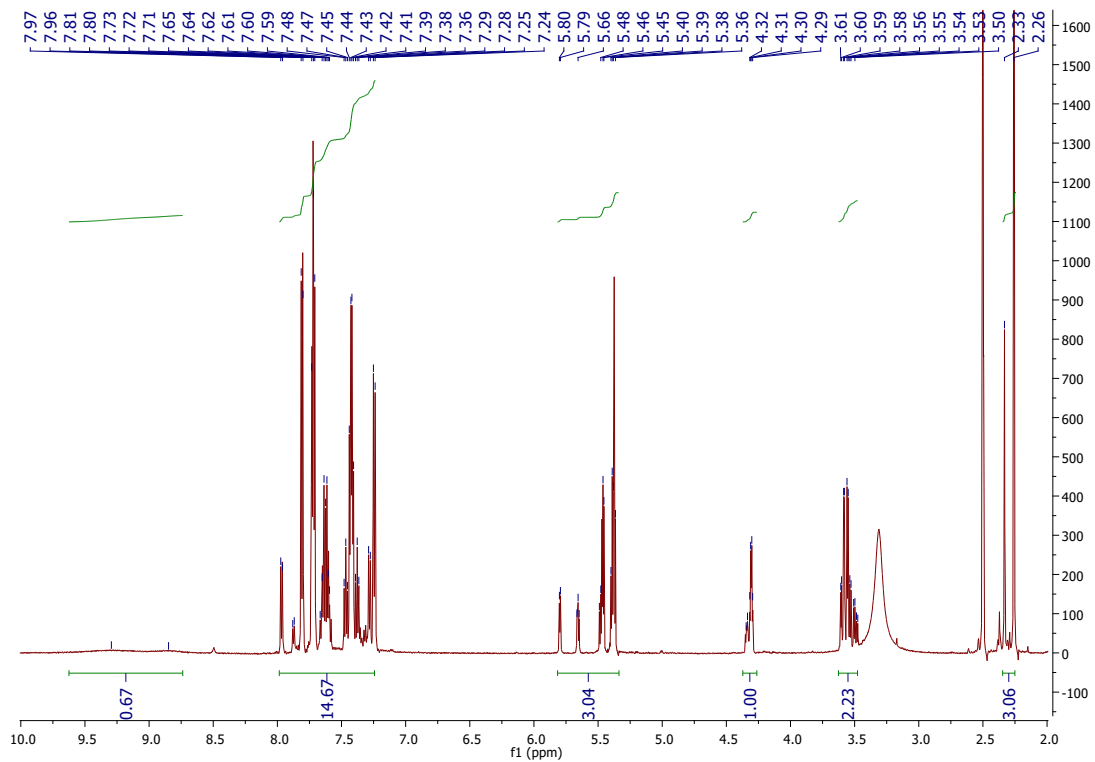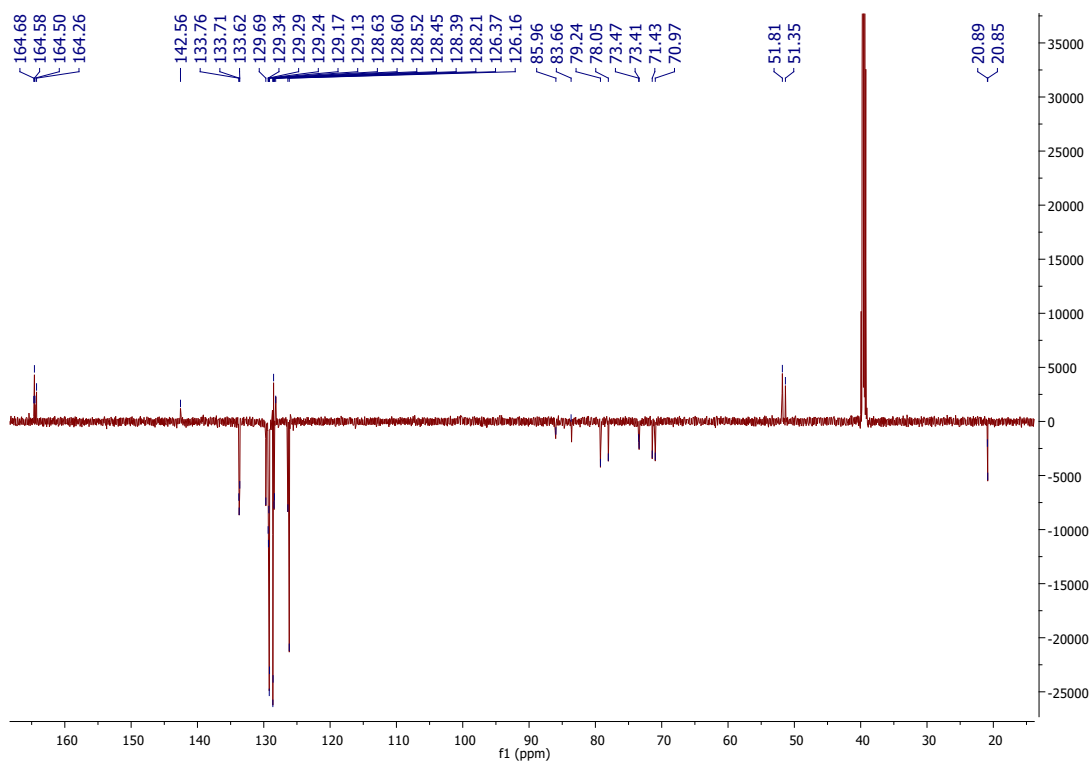

**Figure S20.** <sup>1</sup>H NMR (600 MHz, DMSO-*d*<sub>6</sub>) and <sup>13</sup>C NMR (151 MHz, APT, DMSO-*d*<sub>6</sub>) spectra of compound **31**.

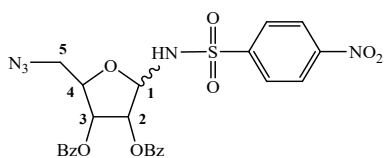

**32**

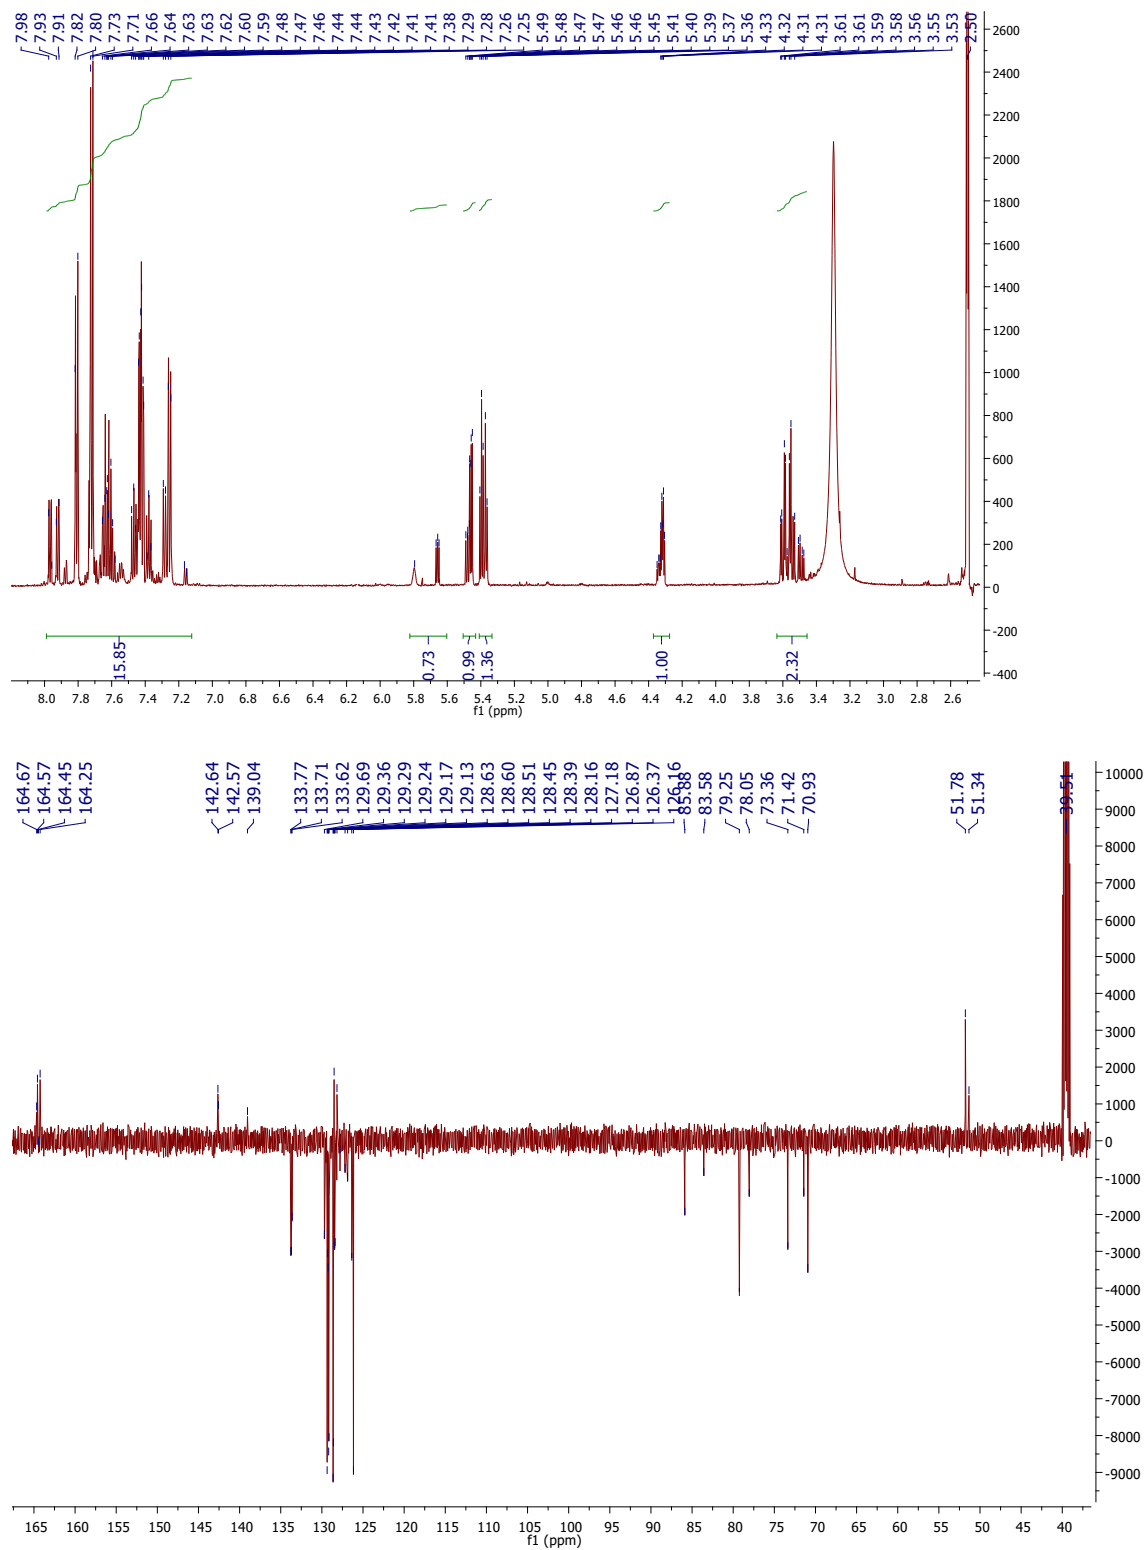

**Figure S21.**  $^1\text{H}$  NMR (600 MHz,  $\text{DMSO-}d_6$ ) and  $^{13}\text{C}$  NMR (151 MHz, APT,  $\text{DMSO-}d_6$ ) spectra of compound **32**.

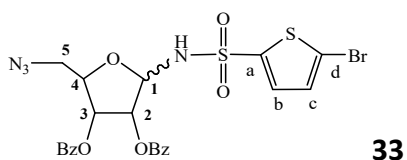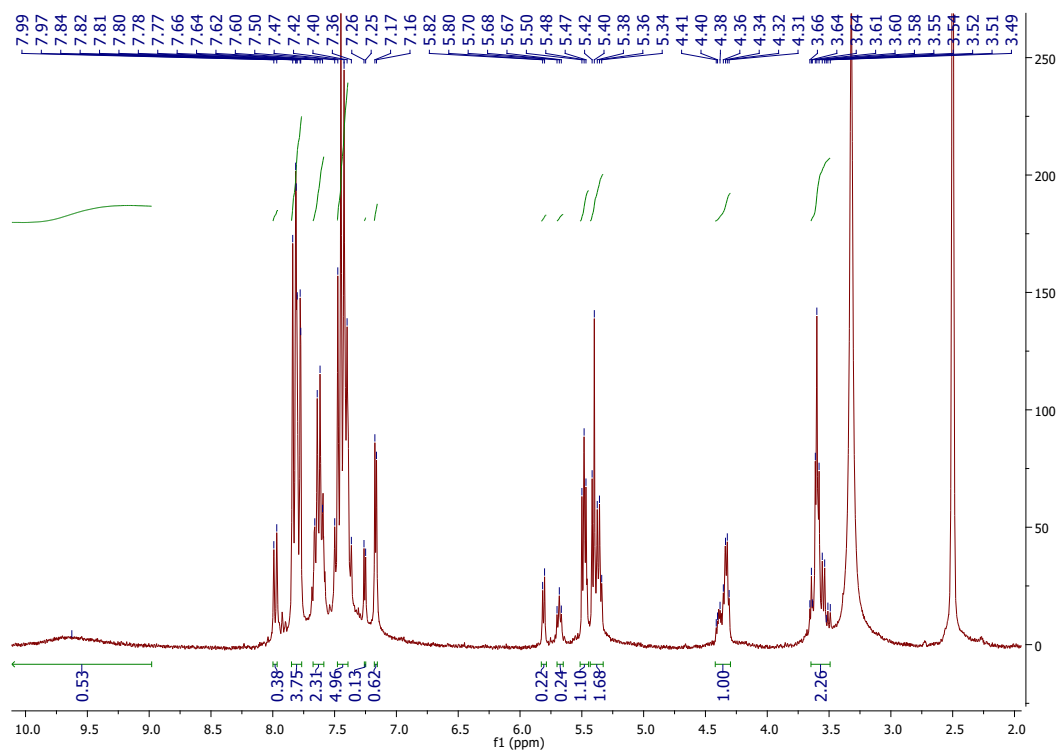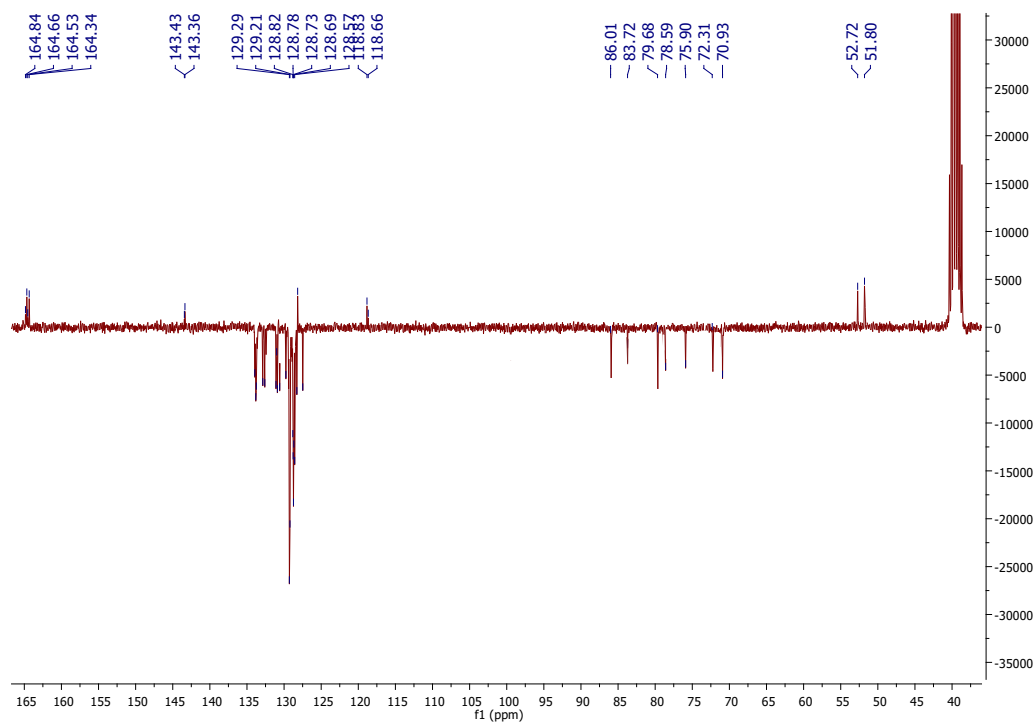

**Figure S22.**  $^1\text{H}$  NMR (300 MHz,  $\text{DMSO-}d_6$ ) and  $^{13}\text{C}$  NMR (75 MHz, APT,  $\text{DMSO-}d_6$ ) spectra of compound **33**.

**Table S1** Sensitivity of human tumor and normal cells to C5–[1,2,3]triazolyl-flex-nucleoside analogs (7–14, 16–20) expressed as IC<sub>50</sub><sup>a</sup> value and SI tumor selectivity indeks

| Comp.       | IC <sub>50</sub> /μM |         |     |         |     |          |    |                 |             |                 |             |                  |            |
|-------------|----------------------|---------|-----|---------|-----|----------|----|-----------------|-------------|-----------------|-------------|------------------|------------|
|             | MDCK                 | HeLa    | SI  | Caco-2  | SI  | NCI-H358 | SI | Raji            | SI          | K562            | SI          | HuT-78           | SI         |
| <b>7</b>    | >100                 | >100    | -   | >100    | -   | >100     | -  | >100            | -           | >100            | -           | 71.8 ±4.3        | 1.4        |
| <b>8</b>    | >100                 | >100    | -   | >100    | -   | >100     | -  | >100            | -           | >100            | -           | 56.8 ±2.1        | 1.8        |
| <b>9</b>    | >100                 | >100    | -   | >100    | -   | >100     | -  | >100            | -           | >100            | -           | 67.2 ±14.1       | 1,5        |
| <b>10</b>   | >100                 | >100    | -   | >100    | -   | >100     | -  | >100            | -           | >100            | -           | 57.3 ±5.8        | 1.8        |
| <b>11</b>   | >100                 | >100    | -   | >100    | -   | >100     | -  | 100             | -           | 94.3±12.0       | -           | 63.7 ±10.2       | 1.6        |
| <b>12</b>   | >100                 | >100    | -   | >100    | -   | >100     | -  | <b>7.8± 4.6</b> | <b>12.8</b> | <b>4.0 ±0.6</b> | <b>25.0</b> | <b>14.3 ±5.6</b> | <b>7.0</b> |
| <b>13</b>   | >100                 | >100    | -   | >100    | -   | >100     | -  | >100            | -           | >100            | -           | <b>17.4 ±5.8</b> | <b>5.8</b> |
| <b>14</b>   | >100                 | >100    | -   | >100    | -   | >100     | -  | 64.5 ±8.1       | 1.6         | 15.9 ±5.3       | <b>6.3</b>  | < 100            | -          |
| <b>16</b>   | >100                 | >100    | -   | >100    | -   | >100     | -  | >100            | -           | >100            | -           | 72.6 ±9.2        | 1.4        |
| <b>17</b>   | >100                 | >100    | -   | >100    | -   | >100     | -  | >100            | -           | 97.5± 15.5      | -           | 90.6 ±16.1       | 1.1        |
| <b>18</b>   | > 100                | >100    | -   | 6.7±1.0 | -   | > 100    | -  | > 100           | -           | 61.3 ±11.8      | 1.6         | > 100            | -          |
| <b>19</b>   | >100                 | >100    | -   | >100    | -   | >100     | -  | > 100           | -           | > 100           | -           | 70.5 ±5.2        | 1.3        |
| <b>20</b>   | >100                 | >100    | -   | >100    | -   | >100     | -  | > 100           | -           | > 100           | -           | 71.8 ±1.6        | 1.4        |
| <b>5-FU</b> | 55±.8.7              | 8.2±1.9 | 6.7 | 5.9±0.7 | 9.3 | ≥50      | -  | > 100           | -           | 9.8±1.1         | 5.6         | > 100            | -          |

<sup>a</sup>IC<sub>50</sub> – Compound concentration that inhibited cell growth by 50 %. Data represents mean IC<sub>50</sub> (μM) values ± standard deviation (SD) of three independent experiments. Exponentially growing cells were treated with compounds during 72 h. Cytotoxicity was analyzed using MTT survival assay. **5-FU**: 5-Fluorouracil.



Table 2. Sensitivity of human tumor and normal cells to investigated ribofuranoside conjugates (**23–28**), and 5-azido-ribosyl-sulfonamides (**31–33**) expressed as  $IC_{50}$ <sup>a</sup> value and **SI** tumor selectivity index.

| Comp.       | MDCK            |     | HeLa            |     | Caco-2          |     | NCI-H358        |    | Raji             |            | K562              |             | HuT-78           |             |
|-------------|-----------------|-----|-----------------|-----|-----------------|-----|-----------------|----|------------------|------------|-------------------|-------------|------------------|-------------|
|             | $IC_{50}/\mu M$ | SI  | $IC_{50}/\mu M$ | SI  | $IC_{50}/\mu M$ | SI  | $IC_{50}/\mu M$ | SI | $IC_{50}/\mu M$  | SI         | $IC_{50}/\mu M$   | SI          | $IC_{50}/\mu M$  | SI          |
| <b>23</b>   | >100            | -   | >100            | -   | >100            | -   | >100            | -  | >100             | -          | >100              | -           | 76.4 ±12.1       | 1.3         |
| <b>24</b>   | 5.7 ±1.1        | -   | 11.6 ±1.3       | -   | 13.3 ±3.7       | -   | 13.4 ±6.4       | -  | 15.4 ±1.1        | -          | 15.7 ±1.3         | -           | 4.8 ±2.8         | -           |
| <b>25</b>   | >100            | -   | >100            | -   | >100            | -   | >100            | -  | >100             | -          | >100              | -           | >100             | -           |
| <b>26</b>   | >100            | -   | 71.9 ±11.1      | -   | 80.6 ±4.2       | -   | >100            | -  | <b>34.5 ±0.1</b> | 2.9        | <b>2.4 ±0.0</b>   | <b>41.7</b> | <b>6.2 ±2.6</b>  | <b>16.3</b> |
| <b>27</b>   | 86.1 ±8.7       | -   | >100            | -   | >100            | -   | 25.2±0.2        | -  | <b>12.5 ±2.6</b> | <b>8.6</b> | <b>10.11 ±1.8</b> | <b>9.9</b>  | <b>40.5 ±6.8</b> | 2.5         |
| <b>28</b>   | >100            | -   | >100            | -   | >100            | -   | >100            | -  | -                | -          | >100              | -           | 76.2 ±0.9        | 1.3         |
| <b>31</b>   | >100            | -   | >100            | -   | >100            | -   | >100            | -  | 76.9 ±3.2        | 1.3        | 47.2 ±27.3        | 2.1         | 57.4 ±8.8        | 1.7         |
| <b>32</b>   | >100            | -   | >100            | -   | >100            | -   | >100            | -  | >100             | -          | 52.7 ±18.2        | -           | 93.9 ±16.0       | -           |
| <b>33</b>   | >100            | -   | >100            | -   | >100            | -   | >100            | -  | <b>10.6 ±0.1</b> | <b>9.4</b> | <b>4.9 ±1.7</b>   | <b>20.4</b> | <b>8.9 ±1.3</b>  | <b>11.2</b> |
| <b>5-FU</b> | 55±.8.7         | 6.7 | 8.2±1.9         | 9.3 | 5.9±0.7         | 9.3 | ≥50             | -  | >100             | -          | 9.8±1.1           | 5.6         | >100             | -           |

<sup>a</sup> $IC_{50}$  – Compound concentration that inhibited cell growth by 50 %. Data represents mean  $IC_{50}$  ( $\mu M$ ) values  $\pm$  standard deviation (SD) of three independent experiments. Exponentially growing cells were treated with compounds during 72 h. Cytotoxicity was analyzed using MTT survival assay. “-” not analysed; **5-FU**: 5-Fluorouracil.
